# Supplementary material for: Spatio-temporal trends in Holocene peat/carbon accumulation rates in China: climatic and human drivers
Source: Research Square preprint supplement (doi:10.21203/rs.3.rs-3136544/v1), 2023-07-14
Supplement: Supplementary file 1 [file a40f1fed9bf85a626e817047.xlsx]

## Sheet: S1
		Site	Altitude (m a.s.l.)	Latitude (°N)	Longitude (°E)	Depth of core (mm)	Depth of peat (mm)	lithology	Number of peat cores	Numbers of absolute 14C dating points	References of peat cores
High altitudes	1	Dangxiong	4280	30.5619	91.1779	5800	3610	peaty material	1	6	[1]
	2	Qinonggou	4270	30.0941	90.5846	1250	1240	brown to brownish black peat	1	4	[2]
	3	Langmusi	3559	34.15	102.567	3460	1770	Tan and dark brown peat	1	8	[3]
	4	Hongyuan (HY)	3509	32.7792	102.517	4500	3450	N/A	1	10	[4]
			3466	32.77	102.5	4950	3820	yellowish-brown and brownish-black herbal peat	1	13	[5]
			3507	32.77	102.5	7540	5290	brown to dark-brown acid peat	1	9	[6]
			3503	32.7792	102.517	7660	7140	Light brown, brown and brownish yellow peat	1	8	[7]
	5	Zoige	3467	33.4541	102.64	3500	2600	N/A	1	4	[8]
			3467	33.45	102.63	650	4370	black, brown and brownish yellow peat	1	4	[9]
			3454	33.45	102.64	4100	2600	N/A	1	3	[10]
	6	Napahai	3272	27.8167	99.6167	2100	700	brownish herbaceous peat	1	5	[11]
	7	Butuo	2697	27.643	102.931	3000	400	black to gray-black peat	1	4	[12]
	8	Sahara sand peatland (SSP)	2450	48.1204	88.3573	7500	7050	black peat	1	22	[13]
			2446	48.1204	88.3573	6520	6000	black peat	1	10	[14]
			2422	48.1204	88.37	5500	4880	weak decomposed peat, mild decomposed peat and strong demcoposed peat	1	8	[15]
			2422	48.1204	88.37	1000	880	brown peat and dark brown peat	1	4	[16]
Middle altitudes	9	Nantun	2202	26.8667	104.25	3390	3380	Grey black, brown black, gray and black peat	1	8	[17]
	10	Big Black	2168	48.6803	87.1837	2000	1710	N/A	1	12	[18]
	11	Xihu	1968	26.0167	100.04	8650	4000	Dark brown, brown and black peat	1	15	[19]
	12	Zhaogongting	1790	26.4111	114.078	2000	1610	brown peat	1	11	[20]
	13	Tielishahan	1770	48.8086	86.9194	3910	3720	brown, light brown moss, yellow moss and dark brown peat	1	5	[21]
	14	Narenxia	1763	48.8	86.9167	4500	4040	brownish yellow peat	1	12	[22]
			1760	48.8	86.9167	3900	2100	poorly decomposation peat, highly-decomposation peat	1	8	[23]
	15	Dajiuhu	1760	31.4	109.933	1200	1140	N/A	1	6	[24]
			1700	31.48	110	2600	2200	N/A	1	13	[25]
			1760	31.49	109.99	2970	1450	black peat, grey black peat with many plant roots	1	6	[26]
			1753	31.48	110	2050	1428	black peat	1	8	[27]
			1758	31.48	109.99	3000	1210	black peat	1	11	[28]
	16	Gutian	1677	26.08	110.366	1250	1000	brown to dark-brown peat	1	6	[29]
			1677	26.08	110.366	1940	730	brown peat	1	4	[30]
			1700	26.08	110.366	2900	2400	black peat	1	9	[31]
			1700	26.08	110.366	2500	2300	black peat	1	10	[31]
			1688	26.08	110.366	1400	960	black peat	1	8	[32]
	17	Tuolehaite	1700	48.44	87.54	3800	3080	black peat	1	8	[33]
	18	Daping	1620	26.5339	110.134	2360	570	gray peat	1	4	[34]
			1620	26.17	110.12	1000	815	gray peat	1	7	[35]
	19	Hengshan	1550	41.81	127.96	4000	3430	black peat	1	17	[36]
	20	Laolike	1475	42.4797	128.666	4990	4560	N/A	1	24	[37]
			1475	42.4797	128.666	7500	6860	N/A	1	14	[37]
	21	Tiantangzhai	1440	31.1667	115.633	1200	920	gray to black peat, grayish brown peat and black peat	1	3	[38]
	22	Anlong	1362	25.1297	105.482	3500	2050	black peat	1	9	[39]
	23	Qianmutian	1760	30.4908	109.99	1480	290	dark brown peat and black peat	1	3	[40]
			1338	30.4908	119.45	1650	1050	black brown peat, brown peat, brown black peat and black peat	1	5	[41]
	24	Xingyi	1317	25.31	104.84	6500	2660	black brown peat, brown peat and tan-peat	1	5	[42]
	25	Wangdongyang	1300	27.6828	119.638	1220	520	brown black peat	1	4	[43]
	26	Wenquan	1300	44.9737	81.0313	1267.5	732.5	N/A	1	6	[44]
	27	Tianhushan	1272	26.7661	119.001	2170	1150	brown peat	1	8	[45]
	28	Dongfanghong	1138	42.1923	128.318	1370	1020	brown-light to dark browm peat	1	5	[46]
			1140	42.19	128.32	1200	770	brown-light to dark browm peat	1	5	[47]
	29	Chaiwopu	1080	43.425	88.0125	3200	2460	poorly decomposed light gray peat, light black peat, poorly decomposed brownish peat and dark black peat	1	10	[48]
	30	Jiangshan	1050	25.7728	118.113	N/A	600	N/A	1	4	[49]
	31	Daiyunshan	1030	25.8444	118.271	2600	2145	greyish-black peat, dark-brown peat and brown peat	1	9	[50]
	32	Shuizhuyang	1002	26.7742	119.046	3000	1920	brown-black peat, finer black peat and light brown-black peat	1	9	[51]
	33	Chasuqi	1000	40.6667	111.133	2630	1790	N/A	1	3	[52]
Low altitudes	34	Hani	900	42.2242	126.512	8780	6600	N/A	1	9	[53]
			900	42.28	126.51	8240	4790	N/A	1	9	[54]
			900	42.28	126.51	9630	3650	dark brown peat and light brown peat	1	4	[55]
			890	42.28	126.51	3500	2340	dark brown peat, black to blue peat and black peat	1	7	[56]
	35	Jingbei	900	42.0008	127.566	1570	820	light brown, brown and dark brown peat	1	5	[46]
	36	Baijianghe	778	42.17	126.74	1800	1400	N/A	1	7	[57]
			778	42.17	126.74	3000	2860	N/A	1	12	[57]
			778	42.17	126.74	2000	1700	N/A	1	8	[57]
			777	42.17	126.73	1800	1300	brown to dark brown peat	1	9	[58]
	37	Jinchuan	700	42.3333	126.367	10000	5500	brown peat	1	10	[59]
			700	42.3333	126.367	6500	3000	black to gray peat	1	4	[60]
			662	42.3333	126.367	5000	2700	N/A	1	6	[61]
	38	Xiaoxinganling	550	48.4131	129.161	2180	1570	blown peat and black brown peat	1	7	[62]
	39	Gushantun	500	42.3	126.283	7350	5950	brown to dark brown peat	1	7	[63]
			506	42.31	126.29	7500	4880	browm peat and brown to black peat	1	10	[64]
	40	Tuqiang	481	52.943	122.355	770	550	light brown peat, dark brown peat and black peat	1	4	[65]
	41	Huanan	480	46.4167	130.85	2500	1500	black peat and brown peat	1	5	[66]
	42	Shuangyang	400	46.6219	125.551	3250	2300	brown black peat and black peat	1	5	[67]
	43	Sanjiang SH	173	46.5818	130.662	1950	1680	black peat	1	7	[68]
	44	Dabusu	150	44.75	126.6	3000	2230	black peat, grey brown peat and black peat	1	5	[67]
	45	Dahuofang	110	42.6667	122.617	4250	3450	grey-brown sandy peat, dark brown sedge peat, brown sedge peat, dark brown peat and brown sedge peat	1	7	[69]
	46	Yangmu	100	45.5667	132.383	1500	640	N/A	1	4	[70]
	47	Sanjiang HX	90	48.5539	134.943	1000	1000	black peat	1	6	[68]
	48	Qingdeli	74	47.9763	133.163	2650	855	N/A	1	3	[71]
			70	47.93	133.23	1960	1740	brown peat, brownish black peat and gray brown to black peat	1	6	[72]
	49	Honghe	71	47.58	133.502	1480	870	black peat	1	6	[73]
	50	Shenjiadian	65	46.5811	130.664	2000	1305	N/A	1	5	[74]
	51	Bielahong	45	47.47	133.22	1700	1075	N/A	1	4	[71]
	52	Dongsheng	35	46.6167	132.517	1570	850	N/A	1	6	[75]
	52 peatlands								83 peat cores	623 14C dates
References:
[1]	Cheung, M.C., Zong, Y.Q., Zheng, Z., Liu, Z.H., Aitchison, J.C. Holocene temperature and precipitation variability on the central Tibetan Plateau revealed by multiple palaeo-climatic proxy records from an alpine wetland sequence. The Holocene 27, 1669-1681 (2017).
[2]	Sun, C.C. et al. Peat record of holocene climate change in the Yangbajing basin,Tibet Plateau. Marine Geology & Quaternary Geology 36, 149-155 (2016). (in Chinese with English abstract)
[3]	Zhou, J. et al. Combined characteristic of organic carbon and lipid compounds from middle holocene peat in Langmusi, Southern Gansu. Quaternary Sciences 28, 754-761 (2008). (in Chinese with English abstract)
[4]	Zeng, M.X., Zhu, C., Song, Y.G., Ma, C.M. & Yang, Z.J. Paleoenvironment change and its impact on carbon and nitrogen accumulation in the Zoige wetland, northeastern Qinghai‐Tibetan Plateau over the past 14,000 years. Geochem. Geophy. Geosy. 18, 1775-1792 (2017).
[5]	Hong, Y.T. et al. Correlation between Indian Ocean summer monsoon and North Atlantic climate during the Holocene. Earth Planet. Sci. Lett. 211, 371-380 (2003).
[6]	Zheng, Y.H. et al. Holocene variations in peatland methane cycling associated with the Asian summer monsoon system. Nat. Commun. 5, 4631 (2014).
[7]	Yan, T.L. et al. Elevational differences in Holocene thermal maximum revealed by quantitative temperature reconstructions at ~30° N on eastern Tibetan Plateau. Palaeogeogr. Palaeoclimatol. Palaeoecol. 570,110364 (2021).
[8]	Chen, H. et al. The carbon stock of alpine peatlands on the Qinghai–Tibetan Plateau during the Holocene and their future fate. Quaternary Sci. Rev. 95, 151-158 (2014).
[9]	Zhao, Y., Yu, Z.C. & Zhao, W.W. Holocene vegetation and climate histories in the eastern Tibetan Plateau: controls by insolation driven temperature or monsoon-derived precipitation changes? Quaternary Sci. Rev. 30, 1173-1184 (2011).
[10]	Guo, C.X. et al. Holocene pollen record in the Tangke peat profile of Sichuan and its palaeoclimatic significance. Acta Palaeontologica Sinican 51, 351-358 (2012). (in Chinese with English abstract)
[11]	Liu, B., Sheng, E.G., Lan, J.H. & Yu, K.K. Peat development in the Napahai wetland and its response to variations in the intensity of the Indian summer monsoon, southwestern China, since the last deglaciation. Palaeogeogr. Palaeoclimatol. Palaeoecol. 598, 111026 (2022).
[12]	Xu, H. et al. Holocene peatland development along the eastern margin of the Tibetan Plateau. Quat. Res. 80, 47-54 (2013).
[13]	Rao, Z.G. et al . Long-term summer warming trend during the Holocene in central Asia indicated by alpine peat α-cellulose δ13C record. Quaternary Sci. Rev. 203, 56-67 (2019).
[14]	Wu, D.D. et al. Peat brGDGTs-based Holocene temperature history of the Altai Mountains in arid Central Asia. Palaeogeogr. Palaeoclimatol. Palaeoecol. 538, 109464 (2020).
[15]	Wang, W. & Zhang, D.L. Holocene vegetation evolution and climatic dynamics inferred from an ombrotrophic peat sequence in the southern Altai Mountains within China. Glob. Planet. Change 179, 10-22 (2019).
[16]	Zhang, D.L., Chen, X., Li, Y.M. & Zhang, S.R. Holocene vegetation dynamics and associated climate changes in the Altai Mountains of the Arid Central Asia. Palaeogeogr. Palaeoclimatol. Palaeoecol. 550, 109744 (2020).
[17]	Niu, R. et al. The Paleoclimate variations of the Nantun peat in the Caohai area since the middle holocene. Quaternary Sciences 37, 1357-1369 (2017). (in Chinese with English abstract)
[18]	Xu, H., Zhou, K.E., Lan, J.H., Zhang, G.L. & Zhou, X.Y. Arid Central Asia saw mid-Holocene drought. Geology 47, 255-258 (2019).
[19]	Xu, H., Yeager, K.M., Lan, J., Liu, B., Sheng, E.G. & Zhou, X.Y. Abrupt Holocene Indian Summer Monsoon failures: A primary response to solar activity? The Holocene. 25, 677-685 (2015).
[20]	Huang, X.Y. et al. Holocene forcing of East Asian hydroclimate recorded in a subtropical peatland from southeastern China. Clim. Dyn. 60, 981-993 (2022).
[21]	Zhang, Y. et al. Holocene climate changes in the central asia mountain region inferred from a peat sequence from the altai mountains, xinjiang, northwestern china. Quaternary Sci. Rev. 152, 19-30 (2016).
[22]	Rao, Z.G.et al. Consistent long‐term Holocene warming trend at different elevations in the Altai Mountains in arid central Asia. J Quaternary Sci. 35, 1036-1045 (2020).
[23]	Zhang, D.L. et al. Peat δ13C celluose-recorded wetting trend during the past 8000 years in the southern Altai Mountains, northern Xinjiang, NW China. J Asian Earth Sci. 156, 174-179 (2018).
[24]	Zhao, Y., HöLzer, A. & Yu, Z.C. Late holocene natural and human-induced environmental change reconstructed from peat records in eastern central china. Radiocarbon 49, 789-798 (2007).
[25]	Huang, X.Y. et al. Moisture conditions during the Younger Dryas and the early Holocene in the middle reaches of the Yangtze River, central China. The Holocene 22, 1473-1479 (2012).
[26]	Ma, C.M. et al. High-resolution geochemistry records of climate changes since late-glacial from Dajiuhu peat in Shennongjia Mountains, Central China. Chinese Sci. Bull. 53, 28-41 (2008).
[27]	Zhang, W.C. et al. Peatland development and climate changes in the Dajiuhu basin, central China, over the last 14,100 years. Quat. Int. 425, 273-281 (2016).
[28]	Liu, H.Y. The changes of depth to water table and ecological evolution of Dajiuhu Peatland on Shennongjia Mountain over the past 13000 years. China University of Geosciences. Doctoral Dissertation (2019). (in Chinese with English abstract)
[29]	Ma, T. et al. Holocene fire and forest histories in relation to climate change and agriculture development in southeastern China. Quat. Int. 488, 30-40 (2017).
[30]	Man, M.L., Zheng, Z., Li, J. & Wang, M.Y. Carbon isotope compositions and climate changes of the past 20,000 years inferred from a mountainous peat bog of northern guangxi. Tropical Geography 36, 468-476 (2016). (in Chinese with English abstract)
[31]	Wei, S.K. et al. Continental-scale long-term Holocene warming trend based on peat brGDGTs records from southeastern humid to northwestern arid China. Palaeogeogr. Palaeoclimatol. Palaeoecol. 619, 111528 (2023).
[32]	Wang, X.X., Huang, X.Y., Sachse, D., Ding, W. & Xue, J.T. Molecular Paleoclimate Reconstructions over the Last 9 ka from a Peat Sequence in South China. PLOS ONE 11, e0160934 (2016).
[33]	Zhang, D.L. et al. Peat δ13C celluose-recorded wetting trend during the past 8000 years in the southern Altai Mountains, northern Xinjiang, NW China. J Asian Earth Sci. 156, 174-179 (2018).
[34]	Zhong, W., Cao, J.Y., Xue, J.B. & Ouyang, J. A 15,400-year record of climate variation from a subalpine lacustrine sedimentary sequence in the western Nanling Mountains in South China. Quat. Res. 84, 246-254 (2015).
[35]	Zhong, W., Xue, J., Ouyang, J., Cao, J., & Peng, Z. Evidence of late Holocene climate variability in the western Nanling Mountains, South China. J Paleolimnol. 52, 1–10 (2014).
[36]	Dong Y M.Holocene peatland initiation, expansion and carbon accumulation in Changbai Mountains. Northeast normal university, Doctoral Dissertation (2021). (in Chinese with English abstract)
[37]	Dong, Y.M., Li, H.K., He, H.S. & Wang,S.Z. Holocene peatland development, carbon accumulation and its response to climate forcing and local conditions in Laolike peatland.,northeast China. Quaternary Sci. Rev. 268, 107124 (2021).
[38]	Huang, R., Zhu, C. & Wang, S.T. Magnetic susceptibility and Rb/Sr Ratio of peat stratum in tiantangzhai and its significance of palaeoclimate. Scientia Geographica Sinica 27, 385-389 (2007). (in Chinese with English abstract)
[39]	Yang, H. 11.4-3.5 ka BP vegetation and climate dynamics derived from a peat record in the southwest of guizhou province. Zhejiang Normal Universtiy. Master's thesis (2021). (in Chinese with English abstract)
[40]	Ma, C.M., Zhu, C., Zheng, C.G., Yin, Q. & Zhao, Z.P. Climate changes in East China since the Late-glacial inferred from high-resolution mountain peat humification records. Sci. China Ser. D: Earth Sci. 52, 118-131 (2009).
[41]	Zhang, Y. et al. Late holocene Rb/Sr ratios as a paleoclimate procy in the Qianmutian peat of Tianmu mountains, Zhejiang province. Journal of stratigraphy 39, 97-107 (2015). (in Chinese with English abstract)
[42]	Yang, H. et al. Application of XRF core scanning method in Late Holocene environment change study derived from a peat core from southwestern Guizhou, Southwestern China. Quaternary Sciences 40, 1154-1169 (2020). (in Chinese with abstract)
[43]	Zhou, Y.P. et al. Magnetic properties of the Wangdongyang subalpine peatland in Zhejiang Province, Eastern China and its paleoenvironmental implications. Quaternary Sciences 37, 1348-1356 (2017). (in Chinese with abstract)
[44]	Li, J.Y. et al. Holocene negative coupling of summer temperature and moisture availability over southeastern arid Central Asia. Clim. Dyn. 55, 1187-1208 (2020).
[45]	Tang, J.H., 2018. Holocene Profile Sediment of Tianhushan in Fujian and Its Paleoclimate Significance. Fujian Normal University. Master's thesis (in Chinese with English abstract).
[46]	Liu, J. Climate Variation Record from Peat in the Changbai Mountains Since the Middle-late Holocene. Northeast Normal University. Master's thesis (2018).(in Chinese with English abstract)
[47]	Dong Y M.Holocene peatland initiation, expansion and carbon accumulation in Changbai Mountains. Northeast normal university, Doctoral Dissertation (2021). (in Chinese with English abstract)
[48]	Yang, Y.P. et al. Holocene hydroclimate variations in the eastern Tianshan Mountains of northwestern China inferred from a palynological study. Palaeogeogr. Palaeoclimatol. Palaeoecol. 564, 110184 (2021).
[49]	Song, Y.P. et al. Enhanced human activity altered the late Holocene vegetation composition in subtropical East Asia. Glob. Planet. Change 214, 103850 (2022).
[50]	Zhao, L. et al. Holocene vegetation dynamics in response to climate change and human activities derived from pollen and charcoal records from southeastern China. Palaeogeogr. Palaeoclimatol. Palaeoecol. 485, 644-660 (2017).
[51]	Wang, X.X. & Huang, X.Y. Paleohydrological changes in southeastern China from 13.1 to 2.5 ka based on a multi-proxy peat record. Palaeogeogr. Palaeoclimatol. Palaeoecol. 534, 109282 (2019).
[52]	Wang, B.Y. & Sun, X.J. A preliminary study on holocene paleoenvironmental changes in Chasuqi peat profile, Inner Mongolia. Chinese Sci. Bull. 42, 514-518 (1997).
[53]	Hong, B. et al. Anti-phase oscillation of Asian monsoons during the Younger Dryas period: Evidence from peat cellulose δ13C of Hani, Northeast China. Palaeogeogr. Palaeoclimatol. Palaeoecol. 297, 214-222 (2010).
[54]	Shi, G. et al. Climate changes recorded by Hani Peat in Northeast China over the past 13.8 cal ka BP. Clim. Past Discuss. 1-12 (2019).
[55]	Zhou, W.J., Zheng, Y.H., Meyers, P. A., Jull, A.J.T. & Xie, S.C. Postglacial climate-change record in biomarker lipid compositions of the Hani peat sequence, Northeastern China. Earth Planet. Sci. Lett. 294, 37-46.
[56]	Yang, J.X. et al. The Environmental Reconstruction of Hani Peatland since 15 cal.ka B.P. Mountain Research 32, 541-549 (2014). (in Chinese with English abstract)
[57]	Dong, Y., Li, H. & Wang, S. He H. The development process of a temperate montane peatland and its controlling factors since the middle Holocene. Sci. China Earth Sci. 66, 594–608 (2023).
[58]	Xia, Y. Y. et al. Peatland development and environmental change during the past 1600 years in baijianghe mire of changbai mountains, china. Quat. Int. 528, 41-52 (2019).
[59]	Huang, T. Peatland archives of holocene volcanic eruption responce to paleoclimate in Northeast China. China University of Geosciences. Doctoral Dissertation (2013). (in Chinese with English abstract)
[60]	Zhao, H.Y., Wang, S.Z. & Li, H.K. Geochemistry of the Holocene peatland in Changbaishan Mountains and its implication for paleoenvironmental change. Journal of Palaeogeography 03, 355-362 (2004)(in Chinese with English abstract).
[61]	Jiang, W.Y. et al. Natural and anthropogenic forest fires recorded in the Holocene pollen record from a Jinchuan peat bog, northeastern China. Palaeogeogr. Palaeoclimatol. Palaeoecol. 261, 47-57 (2008).
[62]	Lin, Q.H., Leng, X.T. & Hong, B. Peat δ13C record of climate change in Xiao Xingan Ling in the past 5000 years. Earth and Environment 32, 1672-9250 (2004). (in Chinese with English abstract)
[63]	Zheng, Y.H. et al. Transition from a warm and dry to a cold and wet climate in NE China across the Holocene. Earth Planet. Sci. Lett. 493, 36-46 (2018).
[64]	Li, N.N. Response of Vegetation Dynamics to Climate Change since the Younger Dryas in the Longgang Region, Northeastern China. Northeast Normal University. Doctoral Dissertation (2020). (in Chinese with English abstract)
[65]	Han, D.X. et al. Late Holocene vegetation and climate changes in the Great Hinggan Mountains, northeast China. Quat. Int. 532, 138-145 (2019).
[66]	Liu, H,Y. Research on the distribution of the phytolith in surface soil and the reconstruction of temperature-humidity pattern during the Holocene in Northeast China. Northeast Normal University. Doctoral Dissertation (2017). (in Chinese with English abstract)
[67]	Gao, G.Z. Phytolith reference for identifying typical plant communities in Northeastern China and its implication in paleo-vegetation reconstruction since the late-glacial period. Northeast Normal University. Doctoral Dissertation (2019). (in Chinese with English abstract)
[68]	Zhang, Z.Q., Yao, Q., Liu, K., Xu, Q.B. & Wang, G.P. Hydrological regime responses to Holocene East Asian summer monsoon circulation in marshes of the Sanjiang Plain, NE China. Land Degrad. Dev. 31, 240-250 (2020).
[69]	Makohonienko, M. et al. Late-Holocene natural and anthropogenic vegetation changes in the Dongbei Pingyuan (Manchurian Plain), northeastern China. Quat. Int. 123, 71-88 (2004).
[70]	Xia, Y.M. & Wang, P.F. Peat record of climate change for the last 3000 years in Yangmu, Mishan region of Sanjiang Plain. J. Geogr. Sci. 11, 454-460 (2001).
[71]	Xia, Y.M. Preliminary Study On Vegetaional Development And Climatic Changes In Thesanjiang Plain In The Last 12000 Years. Scientia Geographica Sinica 08, 240-249 (1988). (in Chinese with English abstract)
[72]	Li, X.Q., Zhao, H.L., Yan, M.H. & Wang, S.Z. Fire variations and relationship among fire and vegetation and climate during holocene at Sanjiang Plain, Northeast China. Scientia Geographica Sinica 25, 177-182 (2005). (in Chinese with English abstract)
[73]	Zhang, Z.Q., Wang, G.P., Jiang, M., Lu, X.G. & Liu, X.H. The impact of Holocene climate changes on Honghe wetland in NE China. Ecol. Eng. 96, 72-78 (2016).
[74]	Wang, C.L., Zhao, H.Y. & Wang, G.P. Vegetation development and water level changes in Shenjiadian peatland in Sanjiang Plain, Northeast China. Chinese Geogr. Sci. 25, 451-461 (2015).
[75]	Zhang, S.Q., Deng, W. & Yan, M.H. Responses of pollen records and climatic fluctuations since 5000 years in Dongsheng, Baoqing, China. Journal of Jilin University (Earth Science Edition) 34, 321-325 (2004). (in Chinese with English abstract)

## Sheet: S2
Peatland code	Site	14C age (yr BP)	Eorr	Calibrated age (cal. yr BP)	Eorr	Depth (mm)	Dating materials
1	Dangxiong	1790	30	1639	39	1100	terrestrial plant fragment
		1930	30	1836	91	1590
		2580	30	2729	29	2390
		3840	30	4233	82.5	3720
		4220	30	4727	32.5	4170
		5200	30	5953	46.5	4710
2	Qinonggou	3260	30	3480	38.5	10	terrestrial plant fragment
		4530	30	5122	70.5	470	total organic carbon
		5590	30	6355	53.5	840	terrestrial plant fragment
		8200	30	9090	65	1250	total organic carbon
3	Langmusi	4065	30	4530	94	260	Full sample of peat
		4640	35	5403	62.5	480
		5010	30	5710	57	720
		5255	35	5981	52	960
		5590	35	6355	56	1180
		5735	35	6538	97	1440
		6050	35	6892	99.5	1680
		6370	35	7295	47	2030
4	HY	327	27	387	76.5	15	plant fragment
		1380	25	1296	20	315
		3069	30	3287	78.5	765
		4261	25	4843	21	1165
		4717	30	5368	44	1425
		5646	27	6442	50.5	1785
		6710	27	7590	29	2175
		7918	29	8695	94	2685
		9010	120	10074	358	3215
		9307	36	10482	106.5	3465
		1291	61	1238	64	380	Cellulose
		1790	76	1702	171.5	640
		2088	42	2044	105.5	780
		3642	44	3966	121.5	1050
		4148	44	4699	129.5	1300
		5304	48	6095	108	1600
		6430	42	7349	75.5	2200
		6669	43	7539	73.5	2340
		6736	180	7621	314	2480
		7704	55	8497	94	2980
		8610	64	9613	134.5	3270
		9037	75	10244	137.5	3710
		9604	84	10949	245.5	4200
		1459	32	1343	43	630	plant fragment
		1825	33	1759	64	960
		2350	39	2401	92	1180
		4764	39	5521	66.5	2580
		5836	39	6641	102.5	3220
		7531	44	8349	62.5	4120
		8074	49	8950	182	4630
		8778	48	9737	183	5310
		9484	48	10700	120.5	5920
		Modern
		600	20	615	30	120	Pollen
		2290	25	2327	24	1120
		4640	30	5418	46.5	2120
		5690	30	6478	79	3160
		8015	30	8889	120.5	4200
		8450	30	9482	48.5	5220
		10720	35	12716	31	7260
5	Zoige	2090	30	2057	70	950	total organic carbon
		3650	30	3952	67	1950
		5770	30	6574	83	2850
		9440	40	10671	105	3550
		945	15	834	41	1400	Charcoal, 3 sedge seeds
		1870	90	1781	212	2100	Charcoal
		3160	20	3384	31.5	2700	Charcoal, 1 charred wood
		4790	20	5509	31.5	3600	Charcoal
		5970	30	6812	80.5	4300	Charcoal, 2 sedge seeds
		6420	50	7342	85	4700	Charcoal
		9030	80	10143	241.5	5770
		1285	25	1230	54	1500	Pollen
		4755	45	5516	71	2900
		7115	35	7967	48	4100
6	Napahai	6379	47	7309	61	900	peat
		8601	39	9603	77	1060
		8869	37	10030	145	1220
		9872	43	11279	77	1390
		10133	38	11749	142	1600
7	Butuo	3109	35	3307	89	800	Cellulose
		4210	35	4691	72	950
		5844	29	6671	71	1070
		6201	38	7078	93	1200
8	SSP	105.5±0.38 pMC				15	a-cellulose
		790	30	702	31	225
		1400	30	1317	32.5	375
		2520	30	2547	53.5	765
		2870	30	2977	98	975
		3150	30	3277	11.5	1065
		3530	30	3760	46	1485
		4060	30	4522	99.5	1815
		4330	30	4904	63	2265
		4390	30	4954	90.5	2685
		4680	30	5396	77	2835
		5180	30	5949	47.5	3375
		5790	30	6581	82.5	3705
		6610	30	7474	44	4215
		7450	30	8266	79	4755
		7590	30	8389	33.5	5115
		7970	40	8843	150	5325
		8230	30	9193	109	5745
		8730	40	9682	132	6315
		8810	40	9822	141.5	6435
		9350	40	10590	100.5	6975
		9740	40	11169	76	7275
		220	30	182	38	20	bulk peat sample
		2550	30	2722	27	520
		3620	30	3914	74	1020
		4180	30	4691	76	2020
		5280	30	6055	67	2520
		5890	30	6720	67	3020
		6430	30	7364	59	3520
		7060	30	7898	64	4020
		7780	30	8556	47	4520
		8900	30	10003	98	6020
		2715	37	2815	62	120	peat
		3696	45	4025	127	500
		4157	45	4701	131	1000
		4881	41	5648	73	1500
		5490	49	6328	67.5	2000
		6072	52	6909	122.5	2500
		6607	49	7476	48	3000
		9499	62	10736	158	5000
		101.76±0.38 pMC				120	sedge residues
		1660	30	1562	50.5	300
		2780	30	2898	58.5	600
		3660	30	3992	94.5	1000
9	Nantun	390	30	467	40.5	10	peat
		1020	30	937	35	380
		1630	30	1480	70.5	810
		2270	30	2206	49.5	1310
		3160	30	3395	55.5	1810
		3800	30	4190	102.5	2300
		4420	30	4962	93	2700
		6130	30	7048	110.5	3390
10	Big black	34	22	51	18	60	cellulose
		697	25	661	16.5	350
		1011	21	931	26	650
		1878	25	1775	57.5	950
		2184	24	2265	44	1200
		2751	22	2829	52	1250
		5553	32	6346	51.5	1300
		6755	38	7622	51.5	1350
		7458	33	8269	81	1450
		7794	43	8543	101	1500
		8377	41	9386	102.5	1700
		8510	31	9508	31	1770
11	Xihu	4247	68	4772	200	3650	Cellulose
		4609	44	5373	97	4000
		5333	27	6152	49	4330
		5874	32	6691	63	4650
		5942	28	6737	65	4830
		6270	30	7212	56	5150
		6490	52	7403	98	5440
		6619	62	7509	85	5650
		7679	60	8468	87	5990
		7814	32	8582	65	6150
		8015	31	8888	121	6500
		8187	32	9086	66	6830
		8254	58	9252	170	7150
		8980	72	10071	180	7480
		9678	37	11137	68	7650
12	Zhaogongting	90	30	82	60	135	plant remains (mainly leaves, seeds and shoots)
		1550	30	1442	77	225
		4470	30	5222	67	365
		4610	30	5419	43	465
		5290	30	6058	68	635
		5770	30	6574	83	815
		6090	30	6935	84	915
		6980	30	7792	76	1235
		9070	30	10221	30	1505
		9880	40	11282	74	1595
		11790	40	13672	90	1745
13	Tielishahan	210	30	182	39.5	190	Plant macrofossils
		2045	40	2001	113	1000	Bulk peat
		3365	35	3568	81	2040
		5485	35	6292	28	3230
		8700	40	9659	116	3910	Wood residues
14	Narenxia	102.52±0.38 pMC				10	plant residue
		20	30	53	21	130	woody trunk
		820	30	715	38	490	plant residue
		1530	30	1385	38	990
		2250	30	2209	55	1490
		3010	30	3200	65	1990
		3540	30	3858	48	2490
		4020	30	4478	58	2880	woody trunk
		4100	30	4587	68	2910
		4590	30	5303	25	3490	plant residue
		6400	30	7313	52	3990
		6780	30	7626	46	4050
		379	39	464	42	395	sedge
		1499	40	1361	58	695
		3214	46	3425	71	995
		3857	45	4282	132	1295
		4368	46	4946	106	1595
		5530	42	6339	62	1895
		6046	75	6909	176	2195
		6408	51	7340	85	2495
15	Dajiuhu	119.8 pMC				40	plant remains
		119.4 pMC				120	sphagnum leaves
		990	40	842	50	280
		1720	40	1591	55	540	plant remains
		3085	20	3299	65	740
		4074	25	4570	56.5	1180
		2455	45	2491	130	345	bulk peat
		2830	40	2958	111	385
		3540	40	3810	113	605
		4225	40	4692	72	775
		4460	40	5127	167	885
		5980	40	6835	104	1005
		8365	40	9381	102	1135
		8565	40	9517	42	1225
		8780	40	9756	160	1405
		9135	40	10318	95	1595
		9295	40	10461	123	1805
		9890	60	11302	106	2205
		10495	60	12556	129	2545
		510	30	528	26	255	terrestrial plant remnants
		1940	30	1860	81	505
		2780	30	2898	59	805
		3490	30	3765	76	1105
		6560	40	7469	47	1405
		7740	30	8517	73	1705
		2010	29	1936	66	186	peat
		3828	26	4223	76	378
		5250	27	5975	47	594
		7091	31	7909	67	798
		7710	36	8482	69	1002	pollen
		8818	35	9827	137	1206
		9261	40	10428	140	1422	peat
		9988	48	11456	193	1614
		2860	30	2973	98	240	plant remains
		3220	30	3423	48	490
		3630	30	3919	74	540
		6250	30	7207	52	620
		6920	30	7737	60	640
		7920	30	8720	90	740
		8560	40	9516	41	880
		8980	50	10175	63	1210
		8990	40	10179	61	1230
		9620	30	10877	94	1290
		10090	40	11643	179	1450
16	Gutian	2030	30	1969	87	250	pollen
		3970	40	4434	92	450
		5740	70	6536	141.5	740
		7650	40	8453	71.5	870	peat
		8738	43	9688	136	1140
		9390	70	10585	202.5	1250	pollen
							peat
		4233	28	4832	24.5	640
		7650	40	8453	71.5	870
		8738	43	9688	136	1140
		11250	60	13168	81.5	1370
		morden				60	plant residues
		520	30	531	24.5	300
		1330	30	1273	28.5	540
		1540	30	1389	36.5	1020
		2030	30	1969	87	1500
		3350	30	3562	78	1740
		3640	30	3938	68	1980
		5060	30	5819	84.5	2220
		6220	30	7069	65.5	2460
		70	30	86	55	100	plant residues
		600	30	615	34.5	340
		2250	30	2209	54.5	500
		3280	30	3508	60.5	900
		3370	30	3599	50.5	1100
		5040	30	5807	93.5	1500
		7770	30	8525	75	1700
		9200	30	10341	92	2000
		9540	40	10796	101	2100
		9660	30	11131	61.5	2400
		260	30	304	26	310	bulk peat
		1130	40	1042	85	490
		1810	30	1721	30	690
		2030	30	1969	87	830
		4130	40	4631	103	990
		6180	30	7072	93	1090
		7220	40	8003	51	1190
		8070	40	9001	34	1270
17	Tolehaite	100.5±0.38 pMC				180	plant residuals
		600	30	615	35	500
		1980	30	1907	44	900
		3100	30	3305	78	1220
		3720	30	4065	88	1700
		4980	30	5677	76	2180
		6340	30	7281	43	2700
		8560	30	9534	14	3260
18	Daping	673	87	627	108.5	265	TOC
		2218	113	2208	286.5	565
		3768	94	4156	257.5	695
		4119	95	4632	216	835
		137	44	79	74	120	TOC
		1474	45	1354	60	235
		2304	59	2387	103	435
		2413	69	2526	184	485
		2610	50	2746	50	565
		2640	50	2786	80	635
		2821	82	2924	160	935
19	Hengshan	Modern				270	sphagnum spp.
		40	64	80	71	390	carex spp.
		231	63	181	49	500
		1027	62	925	138	750
		1285	79	1184	130	890	seed
		1617	63	1490	126	1250	carex spp.
		2240	64	2226	128	1500
		2665	64	3326	621	1800	sphagnum spp.
		3090	68	3297	153	2150
		3502	70	3753	176	2250	carex spp.
		3625	81	3933	219	2500
		4318	66	4929	125	2750	seed
		4533	69	5145	184	2880
		4964	80	5743	159	3000	carex spp.
		5949	71	6794	166	3250
		6457	70	7379	125	3500
		7818	73	8602	181	3700	bulk sample
20	Laolike	303	62	387	114.5	340	herb
		512	66	553	99.5	500
		1199	63	1082	110	700
		1906	65	1826	126	920
		2083	69	2025	155.5	1120
		2464	78	2540	185.5	1290	seed
		2931	69	3065	187	1360	herb
		3333	69	3580	140	1500	seed and leaf
		3757	66	4130	170	1670	herb
		4211	66	4717	150.5	1960
		4466	77	5129	178.5	2160
		5093	69	5801	144	2310	seed
		5257	73	6055	152.5	2490
		6040	77	6903	173.5	2740	leaf
		6371	70	7294	129	2920	seed
		6532	74	7440	131	3090	herb
		7045	91	7851	162	3210	seed
		7444	80	8275	114	3590
		7713	104	8552	226.5	3710	herb
		8182	74	9159	166.5	3950	seed
		8893	77	9959	249	4150	seed and leaf
		9623	77	10965	231.5	4310
		9807	109	11342	280.5	4780	seed
		10100	86	11627	316	4900	herb
		379	83	415	131.5	500	herb
		1120	85	1041	137.5	750	seed
		2391	101	2515	215	1250	herb
		3340	86	3559	170.5	1750
		4486	87	5093	228	2340	seed and leaf
		4856	91	5598	155.5	3060	bulk sample
		5081	86	5798	152	3310
		5374	94	6121	189	3940	herb
		5850	90	6665	220	4300
		6026	88	6872	203	4820	bulk sample
		6861	92	7719	149	5240	herb
		7952	97	9072	5	6180
		9652	145	10954	383.5	6620	seed
		10037	108	11564	319	7360	bulk sample
21	Tiantangzhai	894	133	848	218	215	bulk peat
		3327	151	3958	14.5	465
		4906	207	5690	429	1135
22	Anlong	3440	30	3673	58	430	plant material
		3760	30	4131	56	600
		4480	30	5163	127	1290
		4760	30	5523	62.5	1440
		4960	30	5671	71.5	1630
		6920	30	7737	59.5	1880
		7910	30	8692	94	1920
		8700	30	9645	99	2370
		8790	30	9790	125.5	2480
23	Qianmutian	1381	140	1291	246.5	545	peat
		2477	131	2550	248.5	655
		3086	127	3258	310.5	835
		102.77	0.34	240	13	125	peat
		549	26	540	19	355
		1145	28	1020	60	505
		2292	30	2328	27	975
		3199	28	3413	44	1175
24	Xingyi	1850	30	1766	64	500	plant residuals
		2050	30	2015	90	700
		2300	30	2329	27	1480
		2840	30	2937	72	2420
		3160	30	3395	56	3160
25	Wangdongyang	280	30	309	24	190
						Non-peat part
		1500	30	1360	53	690	peat
		3650	30	3952	67	990
		6510	30	7363	37	1210
26	Wenquan	48	20	53	20	512.5	pollen residue
		1300	25	1203	26.5	615
		1980	25	1908	42.5	762.5
		4070	30	4576	70	915
		5740	35	6541	98.5	1057.5
		8880	40	10034	147	1245	organic matter
27	Tianhushan	389	6	477	18	100	plant residuals
		500	2	523	7.5	160
		599	3	611	20.5	210
		808	4	708	19.5	250
		2703	15	2778	19	530
		2789	14	2901	52	770
		2849	17	2941	64.5	1120
		3089	12	3276	30.5	1250
28	Dongfanghong	458	11	510	10.5	345	leaf and stem
		1496	36	1359	56	675
		2704	65	2845	110	915
		3914	94	4334	251.5	1105
		6364	153	7227	292	1365
		Modern				350	sphagnum spp.
		689	82	634	106	470
		1384	99	1245	176	730	carex spp.
		2117	79	2124	203	860
		3896	88	4309	226	1120	bulk sample
29	Chaiwopu	39	30	50	22	220	plant
		451	29	503	29.5	420
		1268	33	1231	55.5	600
		1462	31	1344	43	1000
		2081	35	2034	92.5	1400
		2425	33	2436	85	1600
		2457	42	2455	93	1800
		3083	42	3294	90	2100
		7895	42	8701	108.5	2500
		8483	45	9488	51.5	2680
30	Jiangshan	725	15	669	11	290	Cellulose
		1345	20	1284	19	490
		2704	34	2808	54	750
		3445	32	3697	79	890
31	Daiyunshan	Modern				50	plant macrofossil
		460	30	509	29	165	chaeered material
		2290	30	2327	26	315	pollen concentrate
		3865	25	4319	89	385	peat fraction
		4605	25	5416	32.5	515
		5240	30	5970	50	805	pollen concentrate
		6030	25	6869	76	1235	peat fraction
		6980	30	7792	76	1695	seed
		7640	30	8421	44	2195	peat fraction
32	Shuizhuyang	2450	30	2452	90.5	330	peat fraction
		3570	30	3878	53.5	610
		4040	30	4500	81	870
		5450	30	6227	27.5	1090
		6830	30	7653	64.5	1190
		7950	30	8904	81.5	1310
		8960	30	10171	54.5	1770
		9320	30	10536	54.5	1930
		10050	30	11572	174.5	2250
33	Chasuqi	1645	80	1540	166	350	peat
		2160	75	2163	174	570
		8200	80	9165	167	2140
34	Hani	807	40	724	52	800	cellulose
		1380	88	1294	120	1350
		2455	46	2491	130	2000
		4674	53	5396	86	3500
		7354	63	8125	102	4950
		7658	64	8461	93.5	5700
		8352	76	9315	182.5	6000
		9604	80	10951	239.5	6250
		10102	80	11665	275.5	7400
		1690	25	1574	42	1270	pollen
		3420	25	3648	73.5	2270
		5020	30	5714	56.5	3270
		7265	35	8091	84	4370
		8860	30	10068	91.5	5010
		9210	35	10345	94.5	5210
						Non-peat part
		9590	40	10951	197	5730	pollen
		9920	30	11320	81	5890
		10330	40	12070	129	6580
		2810	50	2895	113	2010	peat cellulose
		4840	55	5563	100	3500
		6945	65	7772	105	4330	wood fragments
		9410	70	10644	161	5660
		2585	40	2732	36	245	bulk peat
		3040	35	3256	105	755
		4785	35	5528	63	1245
		5235	35	5968	53	1555
		7045	40	7875	88	1845
		8245	40	9204	119	1965
		8435	40	9472	62	2585
35	Jingbei	223	5	161	7	555	leaf and stem
		1160	29	1052	79	855	leaf
		1806	12	1717	19	975	Sphagnum moss
		1929	47	1840	106.5	1245
		3323	23	3531	53	1375	leaf and stem
36	Baijianghe	226	58	181	50	310	sphagnum spp.
		373	64	410	105	500
		488	58	502	62	740	carex spp.
		1028	60	926	134	1120	seed
		1191	59	1074	104	1300	carex spp.
		1231	61	1170	118	1500	seed
		1857	60	1593	303	1710	bulk peat
		Modern				50	seed
		369	63	409	104	140	sphagnum spp.
		485	60	498	66	260
		854	58	755	79	500	carex spp.
		1097	58	1024	109	660
		1250	61	1175	118	900
		1710	61	1621	109	1260	sphagnum spp.
		1756	65	1664	134	1500
		1886	64	1820	124	2000
		1930	63	1854	140	2260
		2898	62	3039	173	2660	bulk sample
		4384	62	4958	116	3000
		419	68	480	62	300	sphagnum spp.
		1207	71	1126	152	500	carex spp.
		1731	89	1644	178	710
		2032	76	1966	186	980	sphagnum spp.
		2272	73	2282	186	1300	carex spp.
		2562	82	2573	209	1490	seed
		3607	73	3951	142	1760	carex spp.
		4576	72	5253	217	2000	bulk sample
		Modern				50	mosses
		50	1	-15	30	150
		63	1	30	30	240	herb
		162	1	182	40	400	mosses
		399	6	495	10	450	herb
		482	7	525	5	560	herb/woody
		596	8	600	35	770	herb/few moss
		860	12	770	15	1000	moss/few herb
		1202	17	1130	35	1350	mosses
37	Jinchuan	767	30	699	29.5	690	peat cellulose
		1237	30	1119	50.5	1490
		1271	30	1231	56	1590
		1783	30	1639	39.5	2300
		2443	30	2450	91.5	2990
		3669	30	3995	94.5	4090
		4056	30	4521	98.5	4570
		4569	30	5295	29	4910
		5236	30	5968	49.5	5510
		5480	30	6290	24	6190
		1945	70	1857	150	2000	bulk peat
		3120	70	3311	157	3000
		4275	75	4810	236	4000
		5130	80	5835	178	5000
		1139	40	1044	87	490	bluk sediment
		1350	30	1277	31	810	charcoal
		1975	35	1910	84	1410	bluk sediment
		3312	44	3545	96	2190
		4510	40	5176	135	2815	charcoal
		5090	40	5830	92	3190	bluk sediment
38	Xiaoxinganling	1430	60	1338	76	600	cellulose
		1890	70	1646	22.5	810
		2240	60	2227	126.5	1040
		2670	60	2824	108.5	1330
		3190	80	3393	184.5	1580
		4010	100	4486	252	1830
		4480	120	5087	246	2170
39	Gushantun	Modern				80	plant fragments
		1560	27	1450	70	1050
		3176	31	3402	52	2880
		5778	37	6577	92	3700
		7151	37	7976	45.5	4280
		8955	41	10169	58	5160
		9558	44	10905	197	6030
		150	25	200	31	465	bulk peat
		1130	20	1018	48	995
		1955	25	1885	61	1495
		2520	20	2546	50	1955
		3900	30	4329	87	2475
		4685	30	5398	80	2995
		4900	35	5625	41	3445
		5880	30	6695	58	3895
		7380	60	8183	150	4465
		9365	45	10599	109	4945
40	Tuqiang	1065	30	964	41.5	220	bulk peat
		1645	30	1553	47.5	360
		2020	30	1939	67.5	570
		3045	35	3262	99.5	770
41	Huanan	905	35	785	52	195	phytonite
		3070	35	3287	81	495
		4035	35	4500	84	805
		6425	40	7348	76	1395
		7785	35	8530	77	1695
42	Shuangyang	1085	25	982	28	600	plant fragments
		1500	20	1375	30	1080
		2235	30	2210	60	1690
		2985	25	3155	85	2500
		3925	35	4342	99	2900	bulk peat
43	Sanjiang SH	550	24	541	17	270	plant residues
		1088	24	983	27.5	600
		1381	26	1297	20	840
		1673	32	1569	54	1070
		2415	30	2425	74.5	1300
		3542	26	3859	45	1650
		6982	90	7817	155.5	1950
44	Dabusu	215	35	182	43	350	plant fragments
		1300	40	1236	61	730
		2625	40	2752	44	1310	bulk peat
		4675	50	5396	86	2250	plant fragments
		6320	60	7258	102	2580	bulk peat
45	Dahuofang	740	70	705	82	650	pollen
		1330	60	1262	87	1050
		1500	50	1362	61	1550
		2100	50	2043	115	1950
		2580	60	2625	161	2450
		2800	60	2917	148	2850
		3960	70	4404	180	4100
46	Yangmu	860	180	828	302	780	bulk peat
		1048	247	969	417	1020
		1900	205	1863	461	1280
		3400	342	3686	844	1420
47	Sangjiang HX	-412	25			0	plant residues
		175	30	182	46	100
		1597	26	1470	61	300
		3508	27	3773	78.5	510
		5070	28	5824	79.5	740	organic matter
		8062	32	9001	28.5	1000
48	Qingdeli	1285	75	1184	128	660	pollen
		4965	90	5745	168	1115
		7645	105	8458	179	1515
		Modern				220	wooden
		2640	50	2786	81	1100	bulk peat
		8605	70	9619	149	1500
		9075	70	10279	156	1700
		9420	70	10650	162	1900
		9660	75	11101	115	1960
49	Honghe	606	23	615	33	380	plant residues
		1243	24	1238	33	600	plant residues and organic matter
		2295	25	2329	23.5	800	plant residues
		2535	30	2547	51.5	940	plant residues and organic matter
		2759	28	2855	77.5	1080	plant residues
		3335	25	3538	57	1250
50	Shenjiadian	550	24	541	17	245	organic matter
		1088	24	983	28	575
		1381	26	1297	20	815
		1673	32	1569	54	1045
		3542	26	3859	45	1550
51	Bielahong	820	70	747	89	525	pollen
		2510	75	2575	172	875
		3075	70	3258	154	1150
		5650	95	6472	184	1600
52	Dongsheng	ND	ND	1333	177	660	organic matter
		ND	ND	2158	207	810
		ND	ND	2968	227	1060
		ND	ND	3678	412	1210
		ND	ND	4027	308	1360
		ND	ND	4417	307	1510

## Sheet: S3
		Site/Core	Altitude (m a.s.l.)	Latitude (°N)	Longitude (°E)	Number of peat cores	Depth of core (mm)	Depth of peat (mm)	Numbers of absolute 14C dating points	References of peat cores
High altitudes	1	Hongyuan	3527	32.78	102.52	1	6530	6190	11	[1],[2]
			3500	33.5	102.5	1	6200	5518	13	[3]
	2	Riganqiao	3471	33.1	102.65	1	6000	3500	3	[4]
	3	Zoige	3467	32.45	102.63	1	6500	4370	7	[5]
	4	Denahequ	3444	33.53	102.81	1	2000	1000	2	[4]
	5	Huahu	3434	33.92	102.87	1	3600	2600	4	[4]
	6	Altai ATM10-C6	2450	48.12	88.36	1	N/A	N/A	20	[6]
Middle altitudes	7	Zhaogongting	1790	26.4111	114.078	1	2000	1610	11	[7]
	8	Altai ATM10-C4	1763	48.8	86.94	1	N/A	6270	20	[6]
	9	Tielishahan	1700	48.81	86.92	1	3910	3720	5	[8]
	10	Tuolehaite	1700	46.51	85.53	1	3800	3080	8	[9]
	11	Daping	1620	26.53	110.14	1	2360	570	4	[10]
			1620	26.17	110.12	1	1000	815	7	[11]
	12	Hengshan	1550	41.81	127.96	1	4000	3430	17	[12]
	13	Laolike	1475	42.48	128.67	1	4990	4560	24	[13]
			1475	42.48	128.67	1	7500	6860	14	[13]
	14	Anlong	1362	25.1297	105.482	1	3500	2050	9	[14]
	15	Dongfanghong	1140	42.19	128.32	1	1200	770	5	[12]
Low altitudes	16	Hani	900	42.22	126.52	1	8300	N/A	N/A	[13]
		Hani	900	42.22	126.52	1	9000	7510	19	[12]
	17	Baijianghe	778	42.17	126.74	1	1800	1400	7	[12]
			778	42.17	126.74	1	3000	2860	12	[12]
			778	42.17	126.74	1	2000	1700	8	[12]
			777	42.17	126.73	1	1800	1300	9	[14]
	18	Lushuihe	775	42.58	127.75	1	1300	1050	5	[15]
	19	Sihe	684	42.46	128.26	1	3100	2650	9	[12]
	20	Jinchuan	635	42.34	126.35	1	5000	4500	8	[12]
			615	42.34	126.36	1	1000	810	6	[15]
	21	Gushantun	500	42.31	126.29	1	5000	4490	13	[12]
	22	Dongdian	450	42.3	126.24	1	1900	1150	6	[12]
	23	Shenjiadian	172	46.58	130.66	1	1350	910	5	[16]
	24	Yangmu	100	45.57	132.38	1	1500	640	4	[17]
	25	Honghe	52	47.79	133.62	1	1400	1010	7	[16]
	25 peatlands					33 peat cores			302 14C dates
References:
[1]	Yu, X., Zhou, W., Franzen, L. G., Xian, F., Cheng, P. & Jull, A. J. T. High-resolution peat records for Holocene monsoon history in the eastern Tibetan Plateau. Sci. China Earth Sci. 49, 615–621 (2006).
[2]	Cai, C., Hong, B. & Zhu, Y. X. Carbon accumulation rates and its influence factors in the Hongyuan Peat, Southwest China. Bull. Mineral. Petrol. Geochem. 3, 309–16 (2014). (in Chinese with English abstract)
[3]	Large, D.J. et al. The influence of climate, hydrology and permafrost on Holocene peat accumulation at 3500 m on the eastern Qinghai–Tibetan Plateau. Quat. Sci. Rev. 28, 3303–3314 (2009).
[4]	Chen, H. et al. The carbon stock of alpine peatlands on the QinghaieTibetan Plateau during the Holocene and their future fate. Quat. Sci. Rev. 95, 151-159 (2014).
[5]	Zhao, Y., Yu, Z.C. & Zhao, W.W. Holocene vegetation and climate histories in the Eastern Tibetan Plateau: controls by insolation-driven temperature or monsoon-derived precipitation changes? Quat. Sci. Rev. 30, 1173–1184 (2011).
[6]	Zhao, Y. et al. Peatland initiation and carbon accumulation in China over the last 50,000 years. Earth Sci. Rev. 128, 139-146 (2014).
[7]	Huang, X.Y. et al. Holocene forcing of East Asian hydroclimate recorded in a subtropical peatland from southeastern China. Clim. Dyn. 60, 1-13 (2022).
[8]	Zhang, Y. et al. Peat properties and Holocene carbon and nitrogen accumulation rates in a peatland in the Xinjiang Altai mountains, northwestern China. J. Geophys. Res. Biogeosci. 125, e2019JG005615 (2020).
[9]	Li, Y. B., Chen, L., & Ran, M. Holocene peat humification and carbon dynamics in the Westerlies-influenced Northwest China. Environ. Res. Lett. 15, 124014 (2020).
[10]	Zhong, W., Cao, J., Xue, J. & Ouyang, J. A 15,400-year record of climate variation from a subalpine lacustrine sedimentary sequence in the western Nanling Mountains in South China. Quaternary Res. 84, 246–254 (2015).
[11]	Zhong, W., Xue, J., Ouyang, J., Cao, J. & Peng, Z. Evidence of late Holocene climate variability in the western Nanling Mountains, South China. J. Paleolimnol. 52, 1–10 (2014).
[12]	Dong, Y. M. Holocene peatland initiation, expansion and carbon accumulation in Changbai Mountains. Northeast normal university, Doctoral Dissertation (2021).
[13]	Dong, Y., Li, H., He, H., & Wang, S. Holocene peatland development, carbon accumulation and its response to climate forcing and local conditions in Laolike peatland, northeast China. Quat. Sci. Rev. 268, 107124 (2021).
[14]	Yang, H. 11.4-3.5 ka BP vegetation and climate dynamics derived from a peat record in the southwest of guizhou province. Zhejiang Normal Universtiy. Master's thesis (2021). (in Chinese with English abstract)
[13]	Cai, C. et al. Holocene peat carbon accumulation rates and influence factors from the Hani peatland, Northeast China. Earth Environ. 41, 597–604 (2013). (in Chinese with English abstract)
[14]	Xia, Y. Y. et al. Peatland development and environmental change during the past 1600 years in Baijianghe Mire of Changbai Mountains, China. Quat. Int. 528, 41-52 (2019).
[15]	Liu, Y. F. Vegetation succession and carbon Vegetation succession and carbon accumulation dynamics in Jinchuan and Lushuihe peatlands in Changbai Mountain and their responses to regional climate change. Northeast normal university, Doctoral Dissertation (2022). DOI:10.27011/d.cnki.gdbsu.2022.001115
[16]	Xing, W., Bao, K., Guo, W., Lu, X., & Wang, G. Peatland initiation and carbon dynamics in northeast China: links to Holocene climate variability. Boreas 44, 575–587 (2015).
[17]	Xia, Y. & Wang, P. Peat record of climate change since 3,000 years in Yangmu, Mishan Region. Geographical research 19, 53-59 (2000). (in Chinese with English abstract)

## Sheet: S4
Site	14C age (yr BP)	Eorr	Calibrated age (cal. yr BP)	Eorr	Depth of peat (mm)	Dating materials
Hongyuan	274	33	400	49	210	bulk peat
	1079	34	970	42	520
	2311	42	2336	39	940
	2652	36	2762	33	1140
	5082	41	5825	94	3000
	5889	49	6701	99	3190
	7382	46	8244	85	4130
	7497	57	8289	102	4450
	8237	49	9199	123	4790
	9245	52	10386	133	5990
	9784	56	11206	111	6400
	ND	ND	207.469	ND	642.857	bulk peat
	ND	ND	804.979	ND	982.143
	ND	ND	1186.72	ND	1089.29
	ND	ND	1485.48	ND	1428.57
	ND	ND	2199.17	ND	1607.14
	ND	ND	2979.25	ND	2375
	ND	ND	4406.64	ND	2660.71
	ND	ND	4473.03	ND	3035.71
	ND	ND	4755.19	ND	3607.14
	ND	ND	5236.51	ND	3857.14
	ND	ND	6215.77	ND	4321.43
	ND	ND	8091.29	ND	5321.43
	ND	ND	9485.48	ND	6160.71
Riganqiao	3400	30	3641	77	2150	bulk peat
	4420	30	4962	93	3050
	10700	50	12703	46	5650
Zoige	945	15	834	41	1400	charcoal,3 sedge seeds
	1870	90	1781	212	2100	charcoal
	3160	20	3384	31	2700	charcoal, 1 charred wood
	4790	20	5509	31	3600	charcoal
	5970	30	6812	80	4300	charcoal, 2 sedge seeds
	6420	50	7342	85	4700	charcoal
	9030	80	10143	241	5770	charcoal
Denahequ	5720	40	6532	97	950	bulk peat
	8960	40	10171	57	1950
Huahu	2090	30	2057	69	950	bulk peat
	2650	30	2758	29	1950
	5770	30	6574	82	2850
	9440	40	10671	105	3550
Zhaogongting	90	30	82	60	135	plant remains (mainly leaves, seeds and shoots)
	1550	30	1442	77	225
	4470	30	5222	67	365
	4610	30	5419	43	465
	5290	30	6058	68	635
	5770	30	6574	83	815
	6090	30	6935	84	915
	6980	30	7792	76	1235
	9070	30	10221	30	1505
	9880	40	11282	74	1595
	11790	40	13672	90	1745
Tielishahan	210	30	182	39.5	190	Plant macrofossils
	2045	40	2001	113	1000	Bulk peat
	3365	35	3568	81	2040
	5485	35	6292	28	3230
	8700	40	9659	116	3910	Wood residues
Tolehaite	100.5±0.38 pMC				180	plant residuals
	600	30	615	35	500
	1980	30	1907	44	900
	3100	30	3305	78	1220
	3720	30	4065	88	1700
	4980	30	5677	76	2180
	6340	30	7281	43	2700
	8560	30	9534	14	3260
Daping	673	87	627	108.5	265	TOC
	2218	113	2208	286.5	565
	3768	94	4156	257.5	695
	4119	95	4632	216	835
	137	44	79	74	120	TOC
	1474	45	1354	60	235
	2304	59	2387	103	435
	2413	69	2526	184	485
	2610	50	2746	50	565
	2640	50	2786	80	635
	2821	82	2924	160	935
Laolike	303	62	387	114.5	340	herb
	512	66	553	99.5	500
	1199	63	1082	110	700
	1906	65	1826	126	920
	2083	69	2025	155.5	1120
	2464	78	2540	185.5	1290	seed
	2931	69	3065	187	1360	herb
	3333	69	3580	140	1500	seed and leaf
	3757	66	4130	170	1670	herb
	4211	66	4717	150.5	1960
	4466	77	5129	178.5	2160
	5093	69	5801	144	2310	seed
	5257	73	6055	152.5	2490
	6040	77	6903	173.5	2740	leaf
	6371	70	7294	129	2920	seed
	6532	74	7440	131	3090	herb
	7045	91	7851	162	3210	seed
	7444	80	8275	114	3590
	7713	104	8552	226.5	3710	herb
	8182	74	9159	166.5	3950	seed
	8893	77	9959	249	4150	seed and leaf
	9623	77	10965	231.5	4310
	9807	109	11342	280.5	4780	seed
	10100	86	11627	316	4900	herb
	379	83	415	131.5	500	herb
	1120	85	1041	137.5	750	seed
	2391	101	2515	215	1250	herb
	3340	86	3559	170.5	1750
	4486	87	5093	228	2340	seed and leaf
	4856	91	5598	155.5	3060	bulk sample
	5081	86	5798	152	3310
	5374	94	6121	189	3940	herb
	5850	90	6665	220	4300
	6026	88	6872	203	4820	bulk sample
	6861	92	7719	149	5240	herb
	7952	97	9072	5	6180
	9652	145	10954	383.5	6620	seed
	10037	108	11564	319	7360	bulk sample
Anlong	3440	30	3673	58	430	plant material
	3760	30	4131	56	600
	4480	30	5163	127	1290
	4760	30	5523	62.5	1440
	4960	30	5671	71.5	1630
	6920	30	7737	59.5	1880
	7910	30	8692	94	1920
	8700	30	9645	99	2370
	8790	30	9790	125.5	2480
Baijianghe	226	58	181	50	310	sphagnum spp.
	373	64	410	105	500	sphagnum spp.
	488	58	502	62	740	carex spp.
	1028	60	926	134	1120	seed
	1191	59	1074	104	1300	carex spp.
	1231	61	1170	118	1500	seed
	1857	60	1593	303	1710	bulk peat
	Morden				50	seed
	369	63	409	104	140	sphagnum spp.
	485	60	498	66	260	sphagnum spp.
	854	58	755	79	500	carex spp.
	1097	58	1024	109	660	carex spp.
	1250	61	1175	118	900	carex spp.
	1710	61	1621	109	1260	sphagnum spp.
	1756	65	1664	134	1500	sphagnum spp.
	1886	64	1820	124	2000	sphagnum spp.
	1930	63	1854	140	2260	sphagnum spp.
	2898	62	3039	173	2660	bulk sample
	4384	62	4958	116	3000	bulk sample
	419	68	480	62	300	sphagnum spp.
	1207	71	1126	152	500	carex spp.
	1731	89	1644	178	710	carex spp.
	2032	76	1966	186	980	sphagnum spp.
	2272	73	2282	186	1300	carex spp.
	2562	82	2573	209	1490	seed
	3607	73	3951	142	1760	carex spp.
	4576	72	5253	217	2000	bulk sample
	Morden				50	mosses
	50	1	-15	30	150	mosses
	63	1	30	30	240	herb
	162	1	182	40	400	mosses
	399	6	495	10	450	herb
	482	7	525	5	560	herb/woody
	596	8	600	35	770	herb/few moss
	860	12	770	15	1000	moss/few herb
	1202	17	1130	35	1350	mosses
Lushuihe	-295		modern		240	moss/few herb
	412		430	115	440	moss/ herb
	1627		1500	110	760	moss
	2631		2780	75	1050	herb
	3524		3800	110	1290	wood/herb

## Sheet: S5
	High altitudes																	Middle altitudes
Peatlands code	1	2	3	4				5			6	7	8					9	10	11	12	13	14		15					16					17	18		19	20		21	22	23		24	25	26	27	28
Site	Dangxiong	Qinonggou	Langmusi	HY				Zoige			Napahai	Butuo	SSP					Nantun	Big Black	Xihu	Zhaogongting	Tielishahan	Narenxia		Dajiuhu					Gutian					Tuolehaite	Daping		Hengshan	Laolike		Tiantangzhai	Anlong	Qianmutian		Xingyi	Wangdongyang	Wenquan	Tianhushan	Dongfanghong
References：	[1]	[2]	[3]	[4]	[5]	[6]	[7]	[8]	[9]	[10]	[11]	[12]	[13]	[14]	[15]	[16]		[17]	[18]	[19]	[20]	[21]	[22]	[23]	[24]	[25]	[26]	[27]	[28]	[29]	[30]	[31]	[31]	[32]	[33]	[34]	[35]	[36]	[37]		[38]	[39]	[40]	[41]	[42]	[43]	[44]	[45]	[46]
Age (yr BP)	PAR (mm/yr)	PAR (mm/yr)	PAR (mm/yr)	PAR (mm/yr)	PAR (mm/yr)	PAR (mm/yr)	PAR (mm/yr)	PAR (mm/yr)	PAR (mm/yr)	PAR (mm/yr)	PAR (mm/yr)	PAR (mm/yr)	PAR (mm/yr)	PAR (mm/yr)	PAR (mm/yr)	PAR (mm/yr)		PAR (mm/yr)	PAR (mm/yr)	PAR (mm/yr)	PAR (mm/yr)	PAR (mm/yr)	PAR (mm/yr)	PAR (mm/yr)	PAR (mm/yr)	PAR (mm/yr)	PAR (mm/yr)	PAR (mm/yr)	PAR (mm/yr)	PAR (mm/yr)	PAR (mm/yr)	PAR (mm/yr)	PAR (mm/yr)	PAR (mm/yr)	PAR (mm/yr)	PAR (mm/yr)	PAR (mm/yr)	PAR (mm/yr)	PAR (mm/yr)	PAR (mm/yr)	PAR (mm/yr)	PAR (mm/yr)	PAR (mm/yr)	PAR (mm/yr)	PAR (mm/yr)	PAR (mm/yr)	PAR (mm/yr)	PAR (mm/yr)	PAR (mm/yr)
0																																0.44555
500				0.32357										0.21079				0.7874	0.70937		0.0617	0.46439	0.61216	0.33065								0.33058	0.31543	0.25063			0.10727	0.59496	0.76448	0.39528				0.56986			0.11247	1.12031
1000				0.29496			0.55481		0.7072				0.26163	0.2327				0.78385	0.70872		0.05634	0.4944	0.65843	0.27795	0.32287		0.20564					2.73449	0.25943	0.26779	0.29757	0.17524	0.12755	0.55997	0.38867	0.37126	0.08787			0.3444			0.13858	0.38236	0.32313
1500				0.27429	0.51772	0.70824	0.51676		0.61087	0.33178			0.29867	0.25461				0.73519	0.53072		0.05499	0.52442	0.65966	0.24042	0.24609		0.22466					0.69804	0.23657	0.37736	0.28196	0.15579	0.16095	0.75193	0.51301	0.38168	0.11251		0.10122	0.3124		0.11436	0.14244	0.56821	0.26271
2000	1.54439			0.26513	0.30193	0.5033	0.4787		0.53518	0.34128			0.34836	0.27652		0.24768		0.6073	0.37157		0.08419	0.55443	0.58632	0.24231	0.232		0.24903	0.0845		0.08149		0.16015	0.21371	0.30926	0.27996	0.13634	0.22618	0.44495	0.6654	0.39517	0.13714		0.13436	0.2879	1.59302	0.10941	0.13083	0.75406	0.21879
2500	1.09562			0.25596	0.26682	0.39933	0.46493	0.50614	0.48595	0.35079			0.39805	0.29843		0.27408		0.54567	0.1961		0.11338	0.55315	0.57814	0.24421	0.23186	0.08732	0.28716	0.0888		0.08726		0.31321	0.43908	0.26009	0.33754	0.13607	0.34577	0.47507	0.26557	0.40867	0.16178		0.16749	0.25796	1.89295	0.10447	0.11802	0.93991	0.17486
3000	0.89144			0.2468	0.25793	0.41766	0.49704	0.48181	0.43672	0.36029			0.4088	0.43528	0.34658	0.30167		0.53046	0.05023		0.14258	0.5518	0.61676	0.2461	0.23172	0.17457	0.30528	0.0931	0.54191	0.09302		0.46626	0.84275	0.21092	0.39512	0.14946		0.78323	0.2062	0.41962	0.18641		0.22383	0.21764	1.58568	0.09953	0.10521	3.83268	0.14083
3500	0.89395	0.28027		0.25997	0.24905	0.43599	0.52915	0.45748	0.40336	0.3698		0.10505	0.6155	0.66392	0.43452	0.33391		0.52488	0.04672		0.17178	0.55046	0.66059	0.26111	0.24975	0.206	0.2453	0.0974	0.28695	0.09878		0.61932	1.24641	0.16176	0.43907	0.16285		0.877	0.27682	0.43049	0.21105					0.09459	0.0924		0.1288
4000	0.89645	0.2833		0.30323	0.2425	0.45432	0.56126	0.43221	0.42253	0.3793		0.09642	0.69989	0.8503	0.52245			0.55558	0.0432		0.20097	0.51366	0.63896	0.35051	0.29482	0.2249	0.21161	0.1017	0.06179	0.10455		0.12971	0.99659	0.11259	0.46173	0.17625		0.79347	0.37531	0.56787	0.23733	0.47736				0.08976	0.0796		0.11677
4500	0.77767	0.28634		0.34648	0.26788	0.47264	0.59337	0.39819	0.4417	0.38881		0.08779	0.80109	0.83329	0.60201			0.50991	0.03968		0.23017	0.47128	0.4704	0.37882	0.33988	0.22339	0.20758	0.10532	0.057	0.10934		0.14684	0.75607	0.06342	0.4232	0.26259		0.59593	0.45714	0.72217	0.28156	0.52802				0.086	0.06679		0.10765
5000	0.62331	0.28937	0.39461	0.38784	0.2928	0.49097	0.62548	0.36416	0.46086	0.39831		0.10096	3.98339	0.76617	0.63313			0.42275	0.03617	0.55225	0.25936	0.42891	0.53501	0.33503		0.17945	0.20354	0.10839	0.0522	0.10776	0.06712	0.16396	0.51556	0.05411	0.37553			0.41816	0.39672	0.87648	0.32579	0.53904				0.08225	0.06446		0.10439
5500	0.52738	0.27015	0.61698	0.40566	0.3174	0.5093	0.6565	0.33014	0.48003	0.40782		0.12761	0.67512	0.66809	0.63198			0.40029	0.03265	0.50391	0.37676	0.38653	0.4991	0.3484		0.13953	0.19951	0.11147	0.04741	0.10617	0.07783	0.18108	0.27505	0.05896	0.32785			0.29322	0.41594	1.2539	0.37003	0.83057				0.07849	0.06402		0.10113
6000		0.24374	0.75052	0.36946	0.34201	0.5268	0.68193	0.29611	0.54278	0.42421		0.15425	0.73297	0.57001	0.71772			0.37784	0.02913	0.50755	0.31464	0.34416	0.42219	0.36177		0.10999	0.19548	0.11589	0.04261	0.10459	0.08853	0.1982	0.1268	0.0638	0.30602			0.24698	0.49398	1.41629		0.60351				0.07474	0.06358		0.09787
6500		0.22101	1.04005	0.34065	0.43097	0.54426	0.70962	0.26209	0.60632	0.44083		0.1809	0.57261	0.69635	0.81963			0.35539	0.03517	1.63511	0.31214	0.31215	0.34528	0.43873		0.08045	0.19144	0.14597	0.03781	0.103	0.09924	0.21532	0.12534	0.06865	0.29835			0.3009	0.43659	1.50175		0.45323				0.07098	0.06314		0.09461
7000		0.20729	0.79875	0.36816	0.53502	0.57831	0.78624	0.24809	0.61844	0.45745		0.29461	0.58409	0.80424	0.85138			0.33293	0.06267	1.6304	0.31891	0.29471	0.26837	0.6291		0.07983	0.18741	0.17606	0.03302	0.11265	0.10995	0.23244	0.12387	0.07349	0.29068			0.31952	0.48545	1.36665		0.30296				0.06722	0.06186		0.09135
7500		0.19356		0.39568	1.09596	0.61888	0.86286	0.23757	0.55785	0.47407	0.08244		0.66513	0.85426	0.74668				0.09016	1.21724	0.27053	0.27727	0.20318			0.13791	0.18666	0.20614	0.05243	0.12317	0.12066		0.1224	0.0832	0.2827			0.28239	0.7086	0.83025		0.15268					0.06051
8000		0.17983		0.40891	0.82593	0.65944	0.93948	0.22705	0.52458		0.11568		1.40873	0.85588	0.7261				0.13873	1.01996	0.22992	0.25983				0.19599	0.23563	0.23442	0.08821	0.13369	0.13137		0.12093	0.09372	0.27431			0.22846	0.61892	0.5681		0.1298					0.05916
8500		0.16611		0.419	0.41549	0.73011	1.0161	0.21653	0.49132		0.14891		1.48359	0.89398	0.70552				0.20338	0.98979	0.20022	0.24239				0.25407	0.28459	0.25387	0.12335	0.14426	0.14112		0.11946	0.087	0.26591			0.17453	0.46131	0.51967		0.22174					0.05782
9000		0.15238		0.43966	0.44383	0.84948	1.09438	0.20601	0.45805		0.18215		0.98897	0.94071	0.68494				0.31593	1.62694	0.17052	0.22495				0.31215		0.2545	0.20899	0.15536	0.14164		0.13851	0.08017	0.25752				0.34669	0.47125		0.37286					0.05647
9500				0.46707	0.47218	0.78113	1.1724	0.19549	0.42479		0.21538		1.0752	0.98853	0.66437				0.56274	0.8976	0.14082	0.20751				0.66357		0.25513	0.33431	0.16645	0.14216		0.15864		0.24913				0.27232	0.52322		0.56088					0.05512
10000				0.49448	0.61203	0.71725	1.0882	0.18497	0.39152		0.25308		0.74085	1.03634	0.64379					0.35785	0.11112					0.70091		0.26059	2.10985	0.15393	0.13552		0.17876						0.22483	0.59207							0.05377
10500					0.69576	0.65738	1.00399	0.17445			0.26897		0.63049		0.62321					0.23221	0.09163					0.94431		0.26704	1.4413	0.12718	0.12456		0.3201						0.47252	0.66093
11000							0.91979				0.28341		0.54513							0.17512	0.08022					0.58837		0.22506	0.15729		0.1136		0.7634						0.71503	0.76038
References：
[1]	Cheung, M.C., Zong, Y.Q., Zheng, Z., Liu, Z.H., Aitchison, J.C. Holocene temperature and precipitation variability on the central Tibetan Plateau revealed by multiple palaeo-climatic proxy records from an alpine wetland sequence. The Holocene 27, 1669-1681 (2017).
[2]	Sun, C.C. et al. Peat record of holocene climate change in the Yangbajing basin,Tibet Plateau. Marine Geology & Quaternary Geology 36, 149-155 (2016). (in Chinese with English abstract)
[3]	Zhou, J. et al. Combined characteristic of organic carbon and lipid compounds from middle holocene peat in Langmusi, Southern Gansu. Quaternary Sciences 28, 754-761 (2008). (in Chinese with English abstract)
[4]	Zeng, M.X., Zhu, C., Song, Y.G., Ma, C.M. & Yang, Z.J. Paleoenvironment change and its impact on carbon and nitrogen accumulation in the Zoige wetland, northeastern Qinghai‐Tibetan Plateau over the past 14,000 years. Geochem. Geophy. Geosy. 18, 1775-1792 (2017).
[5]	Hong, Y.T. et al. Correlation between Indian Ocean summer monsoon and North Atlantic climate during the Holocene. Earth Planet. Sci. Lett. 211, 371-380 (2003).
[6]	Zheng, Y.H. et al. Holocene variations in peatland methane cycling associated with the Asian summer monsoon system. Nat. Commun. 5, 4631 (2014).
[7]	Yan, T.L. et al. Elevational differences in Holocene thermal maximum revealed by quantitative temperature reconstructions at ~30° N on eastern Tibetan Plateau. Palaeogeogr. Palaeoclimatol. Palaeoecol. 570,110364 (2021).																																																0.678397
[8]	Chen, H. et al. The carbon stock of alpine peatlands on the Qinghai–Tibetan Plateau during the Holocene and their future fate. Quaternary Sci. Rev. 95, 151-158 (2014).																																																0.388104
[9]	Zhao, Y., Yu, Z.C. & Zhao, W.W. Holocene vegetation and climate histories in the eastern Tibetan Plateau: controls by insolation driven temperature or monsoon-derived precipitation changes? Quaternary Sci. Rev. 30, 1173-1184 (2011).																																																0.370092
[10]	Guo, C.X. et al. Holocene pollen record in the Tangke peat profile of Sichuan and its palaeoclimatic significance. Acta Palaeontologica Sinican 51, 351-358 (2012). (in Chinese with English abstract)																																																0.264924
[11]	Liu, B., Sheng, E.G., Lan, J.H. & Yu, K.K. Peat development in the Napahai wetland and its response to variations in the intensity of the Indian summer monsoon, southwestern China, since the last deglaciation. Palaeogeogr. Palaeoclimatol. Palaeoecol. 598, 111026 (2022).																																																0.586816
[12]	Xu, H. et al. Holocene peatland development along the eastern margin of the Tibetan Plateau. Quat. Res. 80, 47-54 (2013).																																																0.580081
[13]	Rao, Z.G. et al . Long-term summer warming trend during the Holocene in central Asia indicated by alpine peat α-cellulose δ13C record. Quaternary Sci. Rev. 203, 56-67 (2019).																																																0.198907
[14]	Wu, D.D. et al. Peat brGDGTs-based Holocene temperature history of the Altai Mountains in arid Central Asia. Palaeogeogr. Palaeoclimatol. Palaeoecol. 538, 109464 (2020).																																																0.188673
[15]	Wang, W. & Zhang, D.L. Holocene vegetation evolution and climatic dynamics inferred from an ombrotrophic peat sequence in the southern Altai Mountains within China. Glob. Planet. Change 179, 10-22 (2019).																																																0.196282
[16]	Zhang, D.L., Chen, X., Li, Y.M. & Zhang, S.R. Holocene vegetation dynamics and associated climate changes in the Altai Mountains of the Arid Central Asia. Palaeogeogr. Palaeoclimatol. Palaeoecol. 550, 109744 (2020).																																																0.219328
[17]	Niu, R. et al. The Paleoclimate variations of the Nantun peat in the Caohai area since the middle holocene. Quaternary Sciences 37, 1357-1369 (2017). (in Chinese with English abstract)																																																0.219822
[18]	Xu, H., Zhou, K.E., Lan, J.H., Zhang, G.L. & Zhou, X.Y. Arid Central Asia saw mid-Holocene drought. Geology 47, 255-258 (2019).																																																0.210524
[19]	Xu, H., Yeager, K.M., Lan, J., Liu, B., Sheng, E.G. & Zhou, X.Y. Abrupt Holocene Indian Summer Monsoon failures: A primary response to solar activity? The Holocene. 25, 677-685 (2015).																																																0.317732
[20]	Huang, X.Y. et al. Holocene forcing of East Asian hydroclimate recorded in a subtropical peatland from southeastern China. Clim. Dyn. 60, 981-993 (2022).																																																0.319075
[21]	Zhang, Y. et al. Holocene climate changes in the central asia mountain region inferred from a peat sequence from the altai mountains, xinjiang, northwestern china. Quaternary Sci. Rev. 152, 19-30 (2016).																																																0.320762
[22]	Rao, Z.G.et al. Consistent long‐term Holocene warming trend at different elevations in the Altai Mountains in arid central Asia. J Quaternary Sci. 35, 1036-1045 (2020).																																																0.33202
[23]	Zhang, D.L. et al. Peat δ13C celluose-recorded wetting trend during the past 8000 years in the southern Altai Mountains, northern Xinjiang, NW China. J Asian Earth Sci. 156, 174-179 (2018).																																																0.308993
[24]	Zhao, Y., HöLzer, A. & Yu, Z.C. Late holocene natural and human-induced environmental change reconstructed from peat records in eastern central china. Radiocarbon 49, 789-798 (2007).																																																0.435933
[25]	Huang, X.Y. et al. Moisture conditions during the Younger Dryas and the early Holocene in the middle reaches of the Yangtze River, central China. The Holocene 22, 1473-1479 (2012).																																																0.492128
[26]	Ma, C.M. et al. High-resolution geochemistry records of climate changes since late-glacial from Dajiuhu peat in Shennongjia Mountains, Central China. Chinese Sci. Bull. 53, 28-41 (2008).																																																0.76136
[27]	Zhang, W.C. et al. Peatland development and climate changes in the Dajiuhu basin, central China, over the last 14,100 years. Quat. Int. 425, 273-281 (2016).																																																0.65223
[28]	Liu, H.Y. The changes of depth to water table and ecological evolution of Dajiuhu Peatland on Shennongjia Mountain over the past 13000 years. China University of Geosciences. Doctoral Dissertation (2019). (in Chinese with English abstract)																																																0.298092
[29]	Ma, T. et al. Holocene fire and forest histories in relation to climate change and agriculture development in southeastern China. Quat. Int. 488, 30-40 (2017).
[30]	Man, M.L., Zheng, Z., Li, J. & Wang, M.Y. Carbon isotope compositions and climate changes of the past 20,000 years inferred from a mountainous peat bog of northern guangxi. Tropical Geography 36, 468-476 (2016). (in Chinese with English abstract)
[31]	Wei, S.K. et al. Continental-scale long-term Holocene warming trend based on peat brGDGTs records from southeastern humid to northwestern arid China. Palaeogeogr. Palaeoclimatol. Palaeoecol. 619, 111528 (2023).
[32]	Wang, X.X., Huang, X.Y., Sachse, D., Ding, W. & Xue, J.T. Molecular Paleoclimate Reconstructions over the Last 9 ka from a Peat Sequence in South China. PLOS ONE 11, e0160934 (2016).
[33]	Zhang, D.L. et al. Peat δ13C celluose-recorded wetting trend during the past 8000 years in the southern Altai Mountains, northern Xinjiang, NW China. J Asian Earth Sci. 156, 174-179 (2018).
[34]	Zhong, W., Cao, J.Y., Xue, J.B. & Ouyang, J. A 15,400-year record of climate variation from a subalpine lacustrine sedimentary sequence in the western Nanling Mountains in South China. Quat. Res. 84, 246-254 (2015).
[35]	Zhong, W., Xue, J., Ouyang, J., Cao, J., & Peng, Z. Evidence of late Holocene climate variability in the western Nanling Mountains, South China. J Paleolimnol. 52, 1–10 (2014).
[36]	Dong Y M.Holocene peatland initiation, expansion and carbon accumulation in Changbai Mountains. Northeast normal university, Doctoral Dissertation (2021). (in Chinese with English abstract)
[37]	Dong, Y.M., Li, H.K., He, H.S. & Wang,S.Z. Holocene peatland development, carbon accumulation and its response to climate forcing and local conditions in Laolike peatland.,northeast China. Quaternary Sci. Rev. 268, 107124 (2021).
[38]	Huang, R., Zhu, C. & Wang, S.T. Magnetic susceptibility and Rb/Sr Ratio of peat stratum in tiantangzhai and its significance of palaeoclimate. Scientia Geographica Sinica 27, 385-389 (2007). (in Chinese with English abstract)
[39]	Yang, H. 11.4-3.5 ka BP vegetation and climate dynamics derived from a peat record in the southwest of guizhou province. Zhejiang Normal Universtiy. Master's thesis (2021). (in Chinese with English abstract)
[40]	Ma, C.M., Zhu, C., Zheng, C.G., Yin, Q. & Zhao, Z.P. Climate changes in East China since the Late-glacial inferred from high-resolution mountain peat humification records. Sci. China Ser. D: Earth Sci. 52, 118-131 (2009).
[41]	Zhang, Y. et al. Late holocene Rb/Sr ratios as a paleoclimate procy in the Qianmutian peat of Tianmu mountains, Zhejiang province. Journal of stratigraphy 39, 97-107 (2015). (in Chinese with English abstract)
[42]	Yang, H. et al. Application of XRF core scanning method in Late Holocene environment change study derived from a peat core from southwestern Guizhou, Southwestern China. Quaternary Sciences 40, 1154-1169 (2020). (in Chinese with abstract)
[43]	Zhou, Y.P. et al. Magnetic properties of the Wangdongyang subalpine peatland in Zhejiang Province, Eastern China and its paleoenvironmental implications. Quaternary Sciences 37, 1348-1356 (2017). (in Chinese with abstract)
[44]	Li, J.Y. et al. Holocene negative coupling of summer temperature and moisture availability over southeastern arid Central Asia. Clim. Dyn. 55, 1187-1208 (2020).
[45]	Tang, J.H., 2018. Holocene Profile Sediment of Tianhushan in Fujian and Its Paleoclimate Significance. Fujian Normal University. Master's thesis (in Chinese with English abstract).
[46]	Liu, J. Climate Variation Record from Peat in the Changbai Mountains Since the Middle-late Holocene. Northeast Normal University. Master's thesis (2018).(in Chinese with English abstract)
[47]	Dong Y M.Holocene peatland initiation, expansion and carbon accumulation in Changbai Mountains. Northeast normal university, Doctoral Dissertation (2021). (in Chinese with English abstract)
[48]	Yang, Y.P. et al. Holocene hydroclimate variations in the eastern Tianshan Mountains of northwestern China inferred from a palynological study. Palaeogeogr. Palaeoclimatol. Palaeoecol. 564, 110184 (2021).
[49]	Song, Y.P. et al. Enhanced human activity altered the late Holocene vegetation composition in subtropical East Asia. Glob. Planet. Change 214, 103850 (2022).
[50]	Zhao, L. et al. Holocene vegetation dynamics in response to climate change and human activities derived from pollen and charcoal records from southeastern China. Palaeogeogr. Palaeoclimatol. Palaeoecol. 485, 644-660 (2017).
[51]	Wang, X.X. & Huang, X.Y. Paleohydrological changes in southeastern China from 13.1 to 2.5 ka based on a multi-proxy peat record. Palaeogeogr. Palaeoclimatol. Palaeoecol. 534, 109282 (2019).
[52]	Wang, B.Y. & Sun, X.J. A preliminary study on holocene paleoenvironmental changes in Chasuqi peat profile, Inner Mongolia. Chinese Sci. Bull. 42, 514-518 (1997).
[53]	Hong, B. et al. Anti-phase oscillation of Asian monsoons during the Younger Dryas period: Evidence from peat cellulose δ13C of Hani, Northeast China. Palaeogeogr. Palaeoclimatol. Palaeoecol. 297, 214-222 (2010).
[54]	Shi, G. et al. Climate changes recorded by Hani Peat in Northeast China over the past 13.8 cal ka BP. Clim. Past Discuss. 1-12 (2019).
[55]	Zhou, W.J., Zheng, Y.H., Meyers, P. A., Jull, A.J.T. & Xie, S.C. Postglacial climate-change record in biomarker lipid compositions of the Hani peat sequence, Northeastern China. Earth Planet. Sci. Lett. 294, 37-46.
[56]	Yang, J.X. et al. The Environmental Reconstruction of Hani Peatland since 15 cal.ka B.P. Mountain Research 32, 541-549 (2014). (in Chinese with English abstract)
[57]	Dong, Y., Li, H. & Wang, S. He H. The development process of a temperate montane peatland and its controlling factors since the middle Holocene. Sci. China Earth Sci. 66, 594–608 (2023).
[58]	Xia, Y. Y. et al. Peatland development and environmental change during the past 1600 years in baijianghe mire of changbai mountains, china. Quat. Int. 528, 41-52 (2019).
[59]	Huang, T. Peatland archives of holocene volcanic eruption responce to paleoclimate in Northeast China. China University of Geosciences. Doctoral Dissertation (2013). (in Chinese with English abstract)
[60]	Zhao, H.Y., Wang, S.Z. & Li, H.K. Geochemistry of the Holocene peatland in Changbaishan Mountains and its implication for paleoenvironmental change. Journal of Palaeogeography 03, 355-362 (2004)(in Chinese with English abstract).
[61]	Jiang, W.Y. et al. Natural and anthropogenic forest fires recorded in the Holocene pollen record from a Jinchuan peat bog, northeastern China. Palaeogeogr. Palaeoclimatol. Palaeoecol. 261, 47-57 (2008).
[62]	Lin, Q.H., Leng, X.T. & Hong, B. Peat δ13C record of climate change in Xiao Xingan Ling in the past 5000 years. Earth and Environment 32, 1672-9250 (2004). (in Chinese with English abstract)
[63]	Zheng, Y.H. et al. Transition from a warm and dry to a cold and wet climate in NE China across the Holocene. Earth Planet. Sci. Lett. 493, 36-46 (2018).
[64]	Li, N.N. Response of Vegetation Dynamics to Climate Change since the Younger Dryas in the Longgang Region, Northeastern China. Northeast Normal University. Doctoral Dissertation (2020). (in Chinese with English abstract)
[65]	Han, D.X. et al. Late Holocene vegetation and climate changes in the Great Hinggan Mountains, northeast China. Quat. Int. 532, 138-145 (2019).
[66]	Liu, H,Y. Research on the distribution of the phytolith in surface soil and the reconstruction of temperature-humidity pattern during the Holocene in Northeast China. Northeast Normal University. Doctoral Dissertation (2017). (in Chinese with English abstract)
[67]	Gao, G.Z. Phytolith reference for identifying typical plant communities in Northeastern China and its implication in paleo-vegetation reconstruction since the late-glacial period. Northeast Normal University. Doctoral Dissertation (2019). (in Chinese with English abstract)
[68]	Zhang, Z.Q., Yao, Q., Liu, K., Xu, Q.B. & Wang, G.P. Hydrological regime responses to Holocene East Asian summer monsoon circulation in marshes of the Sanjiang Plain, NE China. Land Degrad. Dev. 31, 240-250 (2020).
[69]	Makohonienko, M. et al. Late-Holocene natural and anthropogenic vegetation changes in the Dongbei Pingyuan (Manchurian Plain), northeastern China. Quat. Int. 123, 71-88 (2004).
[70]	Xia, Y.M. & Wang, P.F. Peat record of climate change for the last 3000 years in Yangmu, Mishan region of Sanjiang Plain. J. Geogr. Sci. 11, 454-460 (2001).
[71]	Xia, Y.M. Preliminary Study On Vegetaional Development And Climatic Changes In Thesanjiang Plain In The Last 12000 Years. Scientia Geographica Sinica 08, 240-249 (1988). (in Chinese with English abstract)
[72]	Li, X.Q., Zhao, H.L., Yan, M.H. & Wang, S.Z. Fire variations and relationship among fire and vegetation and climate during holocene at Sanjiang Plain, Northeast China. Scientia Geographica Sinica 25, 177-182 (2005). (in Chinese with English abstract)
[73]	Zhang, Z.Q., Wang, G.P., Jiang, M., Lu, X.G. & Liu, X.H. The impact of Holocene climate changes on Honghe wetland in NE China. Ecol. Eng. 96, 72-78 (2016).
[74]	Wang, C.L., Zhao, H.Y. & Wang, G.P. Vegetation development and water level changes in Shenjiadian peatland in Sanjiang Plain, Northeast China. Chinese Geogr. Sci. 25, 451-461 (2015).
[75]	Zhang, S.Q., Deng, W. & Yan, M.H. Responses of pollen records and climatic fluctuations since 5000 years in Dongsheng, Baoqing, China. Journal of Jilin University (Earth Science Edition) 34, 321-325 (2004). (in Chinese with English abstract)
[truncated: 35 more columns]

## Sheet: S6
	China				High altitudes				Middle altitudes				Low altitudes
Age (yr BP)	PAR (mm/yr)	gaussian smoothed mean	SD		PAR (mm/yr)	gaussian smoothed mean	SD		PAR (mm/yr)	gaussian smoothed mean	SD		PAR (mm/yr)	gaussian smoothed mean	SD
0
500	0.55319	0.53792	0.07109		0.26718	0.377	0.11128		0.45376	0.42851	0.0567		0.84841	0.75513	0.06002
1000	0.56193	0.52655	0.07109		0.41026	0.39831	0.11128		0.46264	0.42194	0.0567		0.73771	0.71944	0.06002
1500	0.52552	0.50926	0.07651		0.43912	0.41704	0.10762		0.38039	0.41407	0.05688		0.73224	0.67161	0.07174
2000	0.47194	0.48705	0.07651		0.48425	0.43102	0.10762		0.33236	0.40715	0.05688		0.65291	0.61249	0.07174
2500	0.48235	0.4604	0.07898		0.43601	0.43959	0.10653		0.46562	0.39794	0.06167		0.52728	0.54678	0.07261
3000	0.44883	0.43326	0.07898		0.4235	0.4514	0.10653		0.48133	0.38144	0.06167		0.41916	0.48592	0.07261
3500	0.35763	0.40871	0.07404		0.43085	0.46665	0.11097		0.30868	0.35717	0.06669		0.37469	0.43974	0.05507
4000	0.36613	0.39143	0.07404		0.47263	0.48733	0.11097		0.29637	0.33063	0.06669		0.39833	0.41395	0.05507
4500	0.35703	0.38234	0.06729		0.4844	0.50914	0.10819		0.29305	0.3099	0.0594		0.36753	0.40273	0.04423
5000	0.41269	0.37856	0.06729		0.70081	0.52427	0.10819		0.27976	0.29794	0.0594		0.40277	0.39863	0.04423
5500	0.37582	0.37619	0.06643		0.47315	0.53055	0.10228		0.29129	0.29295	0.05376		0.44386	0.39306	0.04763
6000	0.36588	0.37414	0.06643		0.48865	0.53386	0.10228		0.27733	0.29228	0.05376		0.42899	0.38217	0.04763
6500	0.36785	0.37305	0.0661		0.5281	0.54074	0.10699		0.31201	0.29215	0.05424		0.32455	0.36989	0.04524
7000	0.36919	0.37444	0.0661		0.54862	0.55347	0.10699		0.30958	0.2905	0.05424		0.31389	0.36377	0.04524
7500	0.36733	0.37982	0.07083		0.56541	0.57078	0.10858		0.28237	0.28834	0.05482		0.32887	0.36823	0.04989
8000	0.38542	0.39067	0.07083		0.62469	0.58669	0.10858		0.2716	0.29115	0.05482		0.37263	0.38366	0.04989
8500	0.3902	0.40737	0.0754		0.60788	0.59894	0.1039		0.25289	0.30359	0.06462		0.44453	0.40532	0.05339
9000	0.41802	0.42736	0.0754		0.58551	0.60549	0.1039		0.30439	0.32598	0.06462		0.4576	0.42775	0.05339
9500	0.44702	0.44736	0.07364		0.64565	0.60725	0.10165		0.34373	0.35338	0.06649		0.39141	0.44809	0.05175
10000	0.50749	0.46382	0.07364		0.61625	0.6052	0.10165		0.43807	0.37953	0.06649		0.46509	0.46722	0.05175
10500	0.51398	0.47431	0.06768		0.57918	0.60089	0.10317		0.45982	0.39894	0.05904		0.54183	0.4847	0.04945
11000	0.45297	0.47886	0.06768		0.58278	0.59581	0.10317		0.39231	0.4102	0.05904		0.52538	0.49923	0.04945

## Sheet: S7
Site	SSP				HY
References	[1]	[2]	[3]		[4]	[5]	[6]	[7]
Age (yr BP)	δ13C (‰, VPDB)	δ18O (‰, VSMOW)	MBT'5ME		Constant pH-derived MAT (℃), pH = 6	MAT (℃)	δ13C (‰, VPDB)	δ13C (‰, VPDB)
0	0.971751	0.809621	0.312534		0.957827	1		0.682404
500	0.892616	0.890024	0.732069		0.626641	0.645526		0.830375
1000	0.946528	0.826338	1		0.129283	0.128596		0.513295
1500	1	1	0.475639		-0.0811238	-0.468101		1
2000	0.813439	0.228446	0.653664		-0.125813	-0.377536		0.305923
2500	0.630761	0.336352	0.351154		-0.0805227	-0.55468		0.548399
3000	0.926271	-0.267146	0.472997		-0.0885271	-0.429491	0.516092	-0.0880741
3500	0.822761	-0.423763	0.048644		-0.625286	-0.464764	0.385717	-0.456576
4000	0.3572	-0.632909	-0.104826		-0.342819	-0.428936	0.252139	0.544244
4500	0.0923067	-0.948155	-0.0944906		0.356676	-0.168288	0.198348	0.0748254
5000	0.609684	-0.573415	-0.30896		-0.0670508	-0.360879	0.0211775	-0.0746686
5500	0.450367	-0.511173	-0.745746		-0.265445	0.0372268	-0.996044	-1
6000	0.544506	-0.145276	-0.604554		0.248312	0.778999	-1	-0.320309
6500	0.758983	0.248247	-0.70596		0.177176	-0.599041	0.0683225	-0.182988
7000	0.955389	-0.277719	-0.700443		0.551306	-0.283652	-0.139793	-0.628474
7500	0.531652	-0.380467	-0.728184		1	-0.379506	0.228271	-0.122826
8000	0.538586	-0.539169	-0.614422		0.403082	-0.531523	1	-0.502622
8500	0.887337	-0.829325	-0.628953		0.44465	0.0250388	0.655401	0.00568645
9000	-0.132517	-1	-0.769679		0.02729	-0.119819	-0.141435	-0.414405
9500	0.657565	-0.690515	-0.376797		0.0385235	-0.4025	-0.596281	-0.0731287
10000	-0.218993	-0.657267	-0.970083		-0.35346	-1	0.130429	-0.43439
10500	-1	-0.851616	-1		-1	-0.698056	-0.538534	-0.433326
11000			-0.885228		-0.25783	-0.662996	-0.134196	0.548853
References:
[1]	Rao, Z.G. et al. Long-term summer warming trend during the Holocene in central Asia indicated by alpine peat α-cellulose δ13C record. Quat. Sci. Rev. 203, 56-67 (2019).
[2]	Rao, Z.G. et al. Long-term winter/summer warming trends during the Holocene revealed by α-cellulose δ18O/δ13C records from an alpine peat core from central Asia. Quat. Sci. Rev. 232, 106217 (2020).
[3]	Wu, D.D. et al. Peat brGDGTs-based Holocene temperature history of the Altai Mountains in arid Central Asia. Palaeogeogr. Palaeoclimatol. Palaeoecol. 538, 109464 (2020).
[4]	Zheng, Y.H. et al. Peatland GDGT records of Holocene climatic and biogeochemical responses to the Asian Monsoon. Org. Geochem. 87, 86-95 (2015).
[5]	Yan, T.L. et al. Elevational differences in Holocene thermal maximum revealed by quantitative temperature reconstructions at ~30° N on eastern Tibetan Plateau. Palaeogeogr. Palaeoclimatol. Palaeoecol. 570,110364 (2021).
[6]	Wang, F.B. & Yan, G.. A preliminary study on peat δ13C in Zoige Plateau. Chinese Sci. Bull. 38, 65-67 (1993).（in Chinese)
[7]	Hong, Y. T. et al. Correlation between Indian Ocean summer monsoon and North Atlantic climate during the Holocene. Earth Planet. Sci. Lett. 211, 371-380 (2003).

## Sheet: S8
Site	SSP + HY
Age (yr BP)	Temperature	gaussian smoothed mean	SD
0	0.789023	0.68448	0.15995
500	0.769542	0.62424	0.15995
1000	0.590673	0.54461	0.18048
1500	0.487736	0.4433	0.18048
2000	0.249687	0.33206	0.18501
2500	0.205244	0.2217	0.18501
3000	0.148874	0.1205	0.17529
3500	-0.101895	0.02958	0.17529
4000	-0.0508437	-0.04164	0.15704
4500	-0.0698252	-0.09607	0.15704
5000	-0.10773	-0.13161	0.13472
5500	-0.432973	-0.14139	0.13472
6000	-0.0711886	-0.12657	0.14664
6500	-0.0336086	-0.09295	0.14664
7000	-0.0747694	-0.06712	0.13503
7500	0.0212772	-0.05671	0.13503
8000	-0.0351526	-0.07818	0.16013
8500	0.0799765	-0.1388	0.16013
9000	-0.364366	-0.2224	0.17482
9500	-0.206162	-0.31238	0.17482
10000	-0.500538	-0.38961	0.15566
10500	-0.78879	-0.44128	0.15566
11000	-0.27828	-0.46466	0.12983

## Sheet: S9
	High altitudes								Middle altitudes												Low altitudes
Peatlands code	1		2	3	4	5	6		7	8	9	10	11		12	13		14	15		16		17				18	19	20		21	22	23	24	25
Site	Hongyuan		Riganqiao	Zoige	Denahequ	Huahu	Altai2 ATM10-C6		Zhaogongting	Altai1 ATM10-C4	Tielishahan	Tuolehaite	Daping		Hengshan	Laolike		Anlong	Dongfanghong		Hani		Baijianghe				Lushuihe	Sihe	Jinchuan		Gushantun	Dongdian	Shenjiadian	Yangmu	Honghe
References：	[1],[2]	[3]	[4]	[5]	[4]	[4]	[6]		[7]	[6]	[8]	[9]	[10]	[11]	[12]	[13]	[13]	[14]	[12]		[13]	[12]	[12]	[12]	[12]	[14]	[15]	[12]	[12]	[15]	[12]	[12]	[16]	[17]	[16]
Age (yr BP)	CAR (g m-2 yr-1)	CAR (g m-2 yr-1)	CAR (g m-2 yr-1)	CAR (g m-2 yr-1)	CAR (g m-2 yr-1)	CAR (g m-2 yr-1)	CAR (g m-2 yr-1)		CAR (g m-2 yr-1)	CAR (g m-2 yr-1)	CAR (g m-2 yr-1)	CAR (g m-2 yr-1)	CAR (g m-2 yr-1)	CAR (g m-2 yr-1)	CAR (g m-2 yr-1)	CAR (g m-2 yr-1)	CAR (g m-2 yr-1)	CAR (g m-2 yr-1)	CAR (g m-2 yr-1)		CAR (g m-2 yr-1)	CAR (g m-2 yr-1)	CAR (g m-2 yr-1)	CAR (g m-2 yr-1)	CAR (g m-2 yr-1)	CAR (g m-2 yr-1)	CAR (g m-2 yr-1)	CAR (g m-2 yr-1)	CAR (g m-2 yr-1)	CAR (g m-2 yr-1)	CAR (g m-2 yr-1)	CAR (g m-2 yr-1)	CAR (g m-2 yr-1)	CAR (g m-2 yr-1)	CAR (g m-2 yr-1)
0
500	15.7447	9.90883					27.7714			21.2712	21.6178			12.7687	16.6562	35.722	31.3895		28.7095		25.8529	35.8036	48.1928	76.7725	28.0526	83.9612	23.5218	79.5651		31.6742	40.8594		41.1222		34.0066
1000	19.5745	10.2063		13.7124			22.9825		6.63854	20.9531	25.4394	16.284	9.82464	11.9069	31.9464	25.054	29.5066		13.7587		20.4536	29.2917	64.8497	48.7021	28.0027	67.0781	24.2453	132.244	64.2064		40.2188	70.2311	38.1546	40.175	27.3249
1500	21.1915	10.021		17.2838			19.597		6.47945	20.635	27.0987	16.0203	7.97768	11.0717	24.5	23.5716	30.7703		11.2214		35.6158	30.875	53.5438	135.759	59.5297		19.7819	97.1104	54.4859		48.8214	71.3816	37.4758	32.2588	22.2531
2000	25.7143	12.0168		27.8846			22.944		10.6187	22.033	27.7479	20.4927	11.1142	12.7208	19.7955	29.9271	25.8798		18.5055		19.5563	33.1016		153.302	79.2297		17.2039	104.306	38.6666		74.05	40.0043	32.6106	29.7835	21.4416
2500	25.3495	12.8571		28.5384		19.4796	26.291		15.2412	20.1254	26.6334	25.9257	12.3522	20.4732	28.825	38.3881	29.5249		14.6136		8.26169	25.9135		103.369	44.1597		18.6844		50.694		61.7083	60.6583	27.28	27.3081	22.8125
3000	33.4954	13.0526		21.5332		22.5408	29.638		18.8312	16.6572	28.0209	29.8272	11.4511		35.1607	15.9174	34.9834		13.1327		16.8721	21.2589		24.3401	31.7182		16.8702		40.7688		71.4773		24.7099	24.8328	24.4977
3500	33.0496	22.333		24.0365		25.602	32.9851		22.2839	19.7889	29.948	30.3947	12.4923		34.1562	18.9311	33.2613		12.6518		30.001	29.5		25.052	41.0643				39.1633		51.0658		24.5063	22.3575	25.8061
4000	59.8582	31.6135	35.3632	23.3197		28.6633	36.3321		25.5981	24.4635	25.7007	30.3859	10.2806		36.5	24.05	39.838	31.8565	15.9088		54.0749	28.25		21.9521	27.9276				47.7904		41.875				29.5793
4500	44.2553	53.3826	21.2102	26.7663		27.1137	39.6791		28.7762	25.624	27.5083	27.2045	15.5281		27.5469	33.4301	43.1965	35.246			100.01	31.8333		22.7599	27.4685				43.4282		32.375				29.8079
5000	20.2837	16.8075	27.5044	30.5009		24.9942	42.6253		34.2907	23.5961	29.1948	24.7562			26.75	35.6039	50.2132	39.2246			86.8845	47.4688			26.8179				39.8718		29.75				23.2653
5500	24.0425	9.86644	28.026	27.8741		22.8748	31.8706		47.1447	21.5681	24.4076	30.4503			23.975	28.4203	52.7445	57.4369			65.0145	40.75									23.5357				17.6596
6000	26.383	8.98135	19.4484	33.1516		20.7553	23.9301		46.4295	19.5402	22.0453	28.3927			17.1875	25.0834	63.5619	40.5648			35.6611	40.8359									21.5625				16.5185
6500	42.1277	9.70317	25.4088	39.3698		18.6358	22.7238		56.5505	23.3571	19.8523	30.0871			22.7857	19.7058	68.8805	39.5156			24.6459	36.05									37.8125
7000	32.6241	11.8114	14.9081	46.7619	27.8804	17.4743	22.0617		62.946	27.5714	18.0604	28.2906			40.8125	34.3089	78.5098	27.7713			13.9632	20.4125									62.6058
7500	31.2057	13.9196	14.5489	37.9703	20.8322	16.7234	22.2159		54.1751	26.2143	16.3725	31.166			31.925	43.6825	50.5681	14.3829			13.221	13.175									38
8000	38.2979	16.0278	25.2625	35.6596	19.6	15.9725	22.3701		44.5673	25.102	16.7876	27.3428			14.0469	48.8281	70.9821	11.6626			17.6747	10.8125									30.4167
8500	38.156	18.7787	12.9326	31.5861	18.3009	15.2215	22.5244		34.7786	28.4698	15.2541	23.2465			23.3	45.6713	64.9881	12.864			25.7101	11.4375									28.7188
9000	41.2766	24.1009	23.9513	28.8408	23.2639	14.4706	22.5714		26.271	32.1786	14.8284	26.5436				18.4141	71.7584	20.9734			30.5018	18.3295									29.75
9500	36.8511	29.4231	19.8901	28.5956	31.861	13.7196	22.3831		22.299	27.0893	13.3357	25.9938				21.4331	60.7311	33.9764			49.2417	22.325
10000	36.1702		30.2269	21.9944	39.9697	12.9687	21.7662		18.0724	23.1165						21.4791	80.5413				94.1886	35.9545
10500	41.1064					12.2178	23.1889		13.3312	24						24.2394	88.7343				62.8651	39.6875
11000	39.5745						24.7991		10.6061	18.8571						39.9043					44.0361	26.1875
11500																46.0537
References：
[1]	Yu, X., Zhou, W., Franzen, L. G., Xian, F., Cheng, P. & Jull, A. J. T. High-resolution peat records for Holocene monsoon history in the eastern Tibetan Plateau. Sci. China Earth Sci. 49, 615–621 (2006).
[2]	Cai, C., Hong, B. & Zhu, Y. X. Carbon accumulation rates and its influence factors in the Hongyuan Peat, Southwest China. Bull. Mineral. Petrol. Geochem. 3, 309–16 (2014). (in Chinese with English abstract)
[3]	Large, D.J. et al. The influence of climate, hydrology and permafrost on Holocene peat accumulation at 3500 m on the eastern Qinghai–Tibetan Plateau. Quat. Sci. Rev. 28, 3303–3314 (2009).
[4]	Chen, H. et al. The carbon stock of alpine peatlands on the QinghaieTibetan Plateau during the Holocene and their future fate. Quat. Sci. Rev. 95, 151-159 (2014).
[5]	Zhao, Y., Yu, Z.C. & Zhao, W.W. Holocene vegetation and climate histories in the Eastern Tibetan Plateau: controls by insolation-driven temperature or monsoon-derived precipitation changes? Quat. Sci. Rev. 30, 1173–1184 (2011).
[6]	Zhao, Y. et al. Peatland initiation and carbon accumulation in China over the last 50,000 years. Earth Sci. Rev. 128, 139-146 (2014).
[7]	Huang, X.Y. et al. Holocene forcing of East Asian hydroclimate recorded in a subtropical peatland from southeastern China. Clim. Dyn. 60, 1-13 (2022).
[8]	Zhang, Y. et al. Peat properties and Holocene carbon and nitrogen accumulation rates in a peatland in the Xinjiang Altai mountains, northwestern China. J. Geophys. Res. Biogeosci. 125, e2019JG005615 (2020).
[9]	Li, Y. B., Chen, L., & Ran, M. Holocene peat humification and carbon dynamics in the Westerlies-influenced Northwest China. Environ. Res. Lett. 15, 124014 (2020).
[10]	Zhong, W., Cao, J., Xue, J. & Ouyang, J. A 15,400-year record of climate variation from a subalpine lacustrine sedimentary sequence in the western Nanling Mountains in South China. Quaternary Res. 84, 246–254 (2015).
[11]	Zhong, W., Xue, J., Ouyang, J., Cao, J. & Peng, Z. Evidence of late Holocene climate variability in the western Nanling Mountains, South China. J. Paleolimnol. 52, 1–10 (2014).
[12]	Dong, Y. M. Holocene peatland initiation, expansion and carbon accumulation in Changbai Mountains. Northeast normal university, Doctoral Dissertation (2021).
[13]	Dong, Y., Li, H., He, H., & Wang, S. Holocene peatland development, carbon accumulation and its response to climate forcing and local conditions in Laolike peatland, northeast China. Quat. Sci. Rev. 268, 107124 (2021).
[14]	Yang, H. 11.4-3.5 ka BP vegetation and climate dynamics derived from a peat record in the southwest of guizhou province. Zhejiang Normal Universtiy. Master's thesis (2021). (in Chinese with English abstract)
[13]	Cai, C. et al. Holocene peat carbon accumulation rates and influence factors from the Hani peatland, Northeast China. Earth Environ. 41, 597–604 (2013). (in Chinese with English abstract)
[14]	Xia, Y. Y. et al. Peatland development and environmental change during the past 1600 years in Baijianghe Mire of Changbai Mountains, China. Quat. Int. 528, 41-52 (2019).
[15]	Liu, Y. F. Vegetation succession and carbon Vegetation succession and carbon accumulation dynamics in Jinchuan and Lushuihe peatlands in Changbai Mountain and their responses to regional climate change. Northeast normal university, Doctoral Dissertation (2022). DOI:10.27011/d.cnki.gdbsu.2022.001115
[16]	Xing, W., Bao, K., Guo, W., Lu, X., & Wang, G. Peatland initiation and carbon dynamics in northeast China: links to Holocene climate variability. Boreas 44, 575–587 (2015).
[17]	Xia, Y. & Wang, P. Peat record of climate change since 3,000 years in Yangmu, Mishan Region. Geographical research 19, 53-59 (2000). (in Chinese with English abstract)

## Sheet: S10
	China				High altitudes				Middle altitudes				Low altitudes
Age (yr BP)	CAR (g m-2 yr-1)	gaussian smoothed mean	SD		CAR (g m-2 yr-1)	gaussian smoothed mean	SD		CAR (g m-2 yr-1)	gaussian smoothed mean	SD		CAR (g m-2 yr-1)	gaussian smoothed mean	SD
0
500	35.0429	34.621	4.18127		17.8083	17.9833	3.36141		24.0193	20.8127	3.82428		45.7821	49.2233	5.7036
1000	34.0345	34.2003	4.18127		16.619	18.6211	3.36141		19.1312	20.571	3.82428		49.6555	48.8959	5.7036
1500	35.0493	33.497	4.4685		17.0233	19.6533	3.84903		17.9346	20.6365	3.95052		53.7609	47.6578	6.74466
2000	35.7942	32.5018	4.4685		22.1399	21.2664	3.84903		19.8835	21.1307	3.95052		53.6047	45.2482	6.74466
2500	30.5949	31.4413	4.32619		22.5032	23.3913	4.21295		23.2103	22.0649	4.37505		40.9863	42.0832	6.97859
3000	25.8995	30.7306	4.32619		24.052	25.7323	4.21295		22.6646	23.4081	4.37505		29.7346	39.2058	6.97859
3500	27.8448	30.6816	4.20382		27.6013	27.8997	3.69798		23.7676	25.1426	4.70287		32.0574	37.5082	5.78667
4000	31.7905	31.1475	4.20382		35.8583	29.2107	3.69798		26.4582	27.1414	4.70287		35.9213	37.0146	5.78667
4500	34.7341	31.7207	4.09985		35.4012	29.3203	3.54958		29.3401	29.2735	4.74515		41.0976	37.0687	5.7148
5000	34.0202	31.9787	4.09985		27.1193	28.3061	3.54958		32.9537	31.3569	4.74515		42.343	36.7189	5.7148
5500	32.0923	31.746	4.22682		24.0924	26.8114	3.67027		35.7684	33.0194	4.28565		36.74	35.3981	6.58835
6000	28.3352	31.2341	4.22682		22.1083	25.5558	3.67027		32.8507	34.1838	4.28565		28.6445	33.3012	6.58835
6500	31.6007	30.5572	4.35993		26.3282	24.7301	3.25779		35.0918	34.764	3.73579		32.8361	30.7933	6.80577
7000	32.7097	29.7791	4.35993		24.7889	24.2995	3.25779		39.7839	34.6993	3.73579		32.3272	28.2615	6.80577
7500	27.2388	28.9613	4.21051		22.488	24.1309	3.08702		33.5608	34.0158	4.15729		21.4653	26.312	5.5409
8000	27.3008	28.4821	4.21051		24.7415	24.22	3.08702		32.4149	33.1081	4.15729		19.6346	26.3099	5.5409
8500	26.2188	28.6193	4.34114		22.5	24.5177	3.36269		31.0716	32.4158	3.93476		21.9554	28.609	7.6975
9000	27.5308	29.3598	4.34114		25.4965	25.1582	3.36269		30.1382	31.9531	3.93476		26.1938	32.9242	7.6975
9500	28.6968	30.9327	4.80683		26.1034	25.8649	3.4249		29.2655	32.3045	3.98625		35.7834	38.0393	7.6954
10000	36.3707	32.6046	4.80683		27.1827	26.6298	3.4249		35.8023	32.8701	3.98625		65.0716	42.3503	7.6954
10500	36.5967	34.2331	4.70141		25.5044	27.3878	3.39745		37.5762	33.6178	4.12944		51.2763	44.8282	5.83874
11000	29.1378	35.6942	4.70141		32.1868	28.0977	3.39745		23.1225	34.4698	4.12944		35.1118	45.4259	5.83874
11500	46.0537	37.0423	3.97088						46.0537	35.4695	3.70345

[truncated: 1 more sheets: S11]
